# Dual reference method for high precision infrared measurement of leaf surface temperature under field conditions

Jonathan D. Muller<sup>1</sup>, Eyal Rotenberg<sup>1,\*</sup>, Fyodor Tatarinov<sup>1</sup>, Irina Vishnevetsky<sup>1</sup>, Tamir Dingjan<sup>2</sup>, Abraham Kribus<sup>3</sup>, and Dan Yakir<sup>1</sup>

<sup>1</sup>Department of Earth and Planetary Sciences, Weizmann Institute of Science, 7610001 Rehovot, Israel

<sup>2</sup>Department of Biomolecular Sciences, Weizmann Institute of Science, 7610001 Rehovot, Israel

<sup>3</sup>School of Mechanical Engineering, Faculty of Engineering, Tel Aviv University, Tel Aviv 69978, Israel

\*Corresponding author: [eyal.rotenberg@weizmann.ac.il](mailto:eyal.rotenberg@weizmann.ac.il)

April 2021

## Abstract

- Temperature is a key control over biological activities from the cellular to the ecosystem scales. However, direct, high precision measurements of surface temperature of small objects such as leaves under field conditions with large variations in ambient conditions remain rare. Contact methods such as thermocouples are prone to large errors. The use of non-contact remote sensing methods such as thermal infrared measurements provides an ideal solution, but their accuracy has been low (in the order of  $\sim 2^\circ\text{C}$ ) due to necessity for corrections for material emissivity and fluctuations in background radiation ( $L_{bg}$ ).
- A novel ‘dual-reference’ method was developed to increase the accuracy of infrared needle-leaf surface temperature measurements in the field. It accounts for variations in  $L_{bg}$  and corrects for the systematic camera offset using two reference plates.
- We accurately captured surface temperature and leaf-to-air temperature differences of needle-leaves in a forest ecosystem with large diurnal and seasonal temperature fluctuations with an uncertainty of  $\pm 0.23$  and  $\pm 0.25^\circ\text{C}$ , respectively.
- Routine high precision leaf temperature measurements even under harsh field conditions, such as demonstrated here, opens the way for investigating a wide range of leaf-scale processes and its dynamics.

## 1 Introduction

Leaf pigments are optimised for the absorption of sunlight for photochemistry (Loomis, 1965). However, the heating associated with this absorption of solar energy poses a conundrum for plants: high temperatures can negatively affect a variety of biochemical and physical processes (Still et al., 2019; Baldocchi and Penuelas, 2019), such as damage to photosystems I & II or the carbon reduction cycle (O’sullivan et al., 2017; Maseyk, 2006; Long et al., 1994; Werner et al., 2002). Therefore, plant canopies in high radiation and high temperature environments are challenged with the need for leaf cooling (Gates

et al., 1968; Drake et al., 2018) to remain below their physiological heat limit, usually between  $20\text{--}35^\circ\text{C}$  for  $\text{C}_3$  plants (Chaves et al., 2016; Doughty and Goulden, 2008).

Leaf cooling can partially be achieved through transpiration, leading to evaporative cooling. However, this mechanism could lead to an increased water loss due to open stomata, especially when combined with a rise in vapour pressure deficit (VPD) due to drying air or to an increase in leaf temperature (Smith et al., 2019; Richardson et al., 2020). To reduce this water loss, plants can close their stomata (Yong et al., 1997; Urban et al., 2017; Prashar and Jones, 2016), but risk a reduction in evaporative cooling. Alternatively,

14  
15  
16  
17

18  
19  
20  
21  
22  
23  
24  
25  
26  
27

28 non-evaporative cooling relies on convection, which  
29 is controlled by wind speed and leaf structures that  
30 help adjust leaf temperature to its surrounding air  
31 (Leigh et al., 2012, 2017; Loomis, 1965). Therefore,  
32 leaf-to-air temperature difference ( $\Delta T_{leaf-air}$ ) has  
33 often been used as a stress indicator in agricultural  
34 crops (Kim et al., 2018; Maimaitijiang et al., 2020;  
35 Zhang et al., 2019; Song et al., 2017; Jones et al.,  
36 2009; Long et al., 2006; Fuchs, 1990). Thus, efficient  
37 leaf cooling relies on a set of complex mechanisms  
38 to minimize  $\Delta T_{leaf-air}$ . In colder climates or sea-  
39 sons, leaf temperature plays different but equally  
40 important roles. For instance, leaf unfolding or frost  
41 damage (Bigler and Bugmann, 2018) could be re-  
42 duced through adequate leaf temperature control.  
43 Clearly, an assessment of many physiological pro-  
44 cesses requires accurate leaf surface temperature and  
45  $\Delta T_{leaf-air}$  measurements.

46 Direct and continuous measurements of leaf sur-  
47 face temperature remain rare in natural environments  
48 such as forests (Still et al., 2019; Aubrecht et al., 2016)  
49 and have relied on either the usage of thin-wire ther-  
50 mocouples or thermal infrared imagery. The usage of  
51 fine-wire thermocouples has been widespread for dec-  
52 ades, but present multiple challenges: (a) Attaching  
53 them to leaves requires a huge effort and problems  
54 with the attachment ensue due to leaf motion, which  
55 restricts it to small sample sizes and short measure-  
56 ment periods (Aubrecht et al., 2016); (b) a holding  
57 structure that applies gentle pressure or some sort of  
58 glue is required, both of which can introduce errors  
59 due to their thermal conductivity and changes in sur-  
60 face properties (e.g. surface emissivity); (c) a large  
61 part of thermocouple junction is exposed, leading  
62 to radiative and convective heat exchange with the  
63 environment and resulting in systematic errors up to  
64 several degrees, even for tiny 0.1mm diameter junc-  
65 tions (Tarnopolsky and Seginer, 1999; Pieters and  
66 Schurer, 1973). Due to these difficulties, many recent  
67 studies have chosen to use infrared thermography  
68 for leaf temperature measurements (Still et al., 2019,  
69 2021).

70 Infrared thermographers (IR cameras and sensors)  
71 are considered to have a low accuracy with an un-  
72 certainty of several degrees in spite of their high  
73 precision for several reasons. Firstly, systematic cam-  
74 era error due to instrument drift is one cause of  
75 error when cameras aren't calibrated yearly, e.g. due  
76 to cost, as opposed to manufacturer recommenda-  
77 tions (e.g., FLIR, 2011). For this purpose, many  
78 studies have employed a reference plate with a high  
79 emissivity to correct readings (Aubrecht et al., 2016).

Secondly, the accuracy of IR temperature measure- 80  
ments depends on leaf/object emissivity ( $\varepsilon_{obj}$ ), reflec- 81  
ted background thermal radiation originating from 82  
the environment ( $L_{bg}$ ), the thermal radiation emitted 83  
by the air column between leaves and the infrared 84  
camera and its transmittance. When these para- 85  
meters are available, leaf/object surface temperature 86  
can be accurately calculated, either directly to the 87  
camera at the time of measurement (FLIR, 2011) or 88  
in post-processing. Inaccuracies in these paramet- 89  
ers can lead to large measurement errors, such as 90  
changes in leaf emissivity during leaf emergence that 91  
can produce errors of up to 3 °C (Richardson et al., 92  
2020). Also, accurately measuring  $L_{bg}$  is challenging. 93  
Therefore,  $L_{bg}$  has often been ignored in ecological 94  
applications, for instance due to the high emissivity 95  
of natural materials (Aubrecht et al., 2016) since 96  
the contribution of  $L_{bg}$  becomes smaller than 5 % for 97  
 $\varepsilon_{obj} > 0.95$ . This simplification can however lead 98  
to substantial errors in resulting temperature values 99  
(Kim et al., 2016). Direct measurements could be 100  
achieved with a hemispherical longwave sensor near 101  
the measured surface operating in the exact same 102  
spectral range as the infrared camera. However, most 103  
sensors of this type have a different spectral range 104  
than infrared cameras. Alternatively, some studies 105  
developed empirical correction equations (Kim et al., 106  
2018) or simply used air temperature and/or relative 107  
humidity as a substitute to calculate  $L_{bg}$  (Birami 108  
et al., 2018; Minkina and Dudzik, 2009). This tech- 109  
nique allows for good estimates under a clear sky 110  
(Rosa and Stanhill, 2014). However, to our knowl- 111  
edge, the effect of these approximations has not yet 112  
been fully assessed under field conditions within the 113  
tree canopy layer. Finally, most work presently done 114  
using non-contact thermal infrared imagery in forests 115  
focused on the canopy scale or regions of the canopy 116  
(Still et al., 2019; Kim et al., 2018; Aubrecht et al., 117  
2016; Leuzinger and Körner, 2007; Leuzinger et al., 118  
2010), but not on the more fine-grained leaf scale. 119

120 We present a method that addresses the challenges  
121 in accurate measurements of leaf temperature ( $T_{leaf}$ )  
122 and leaf-to-air temperature differences ( $\Delta T_{leaf-air}$ )  
123 using thermal infrared imaging in the changing en-  
124 vironment of field conditions. This method can be  
125 applied to leaves as tiny as conifer needles in mature  
126 trees. We used an infrared camera and two refer-  
127 ence plates to continuously and accurately measure  
128 (a)  $L_{bg}$  and (b)  $T_{leaf}$  and  $\Delta T_{leaf-air}$ . To demon-  
129 strate the use of our proposed method, we employed  
130 our setup in a natural forest environment. 130

## 1.1 Theory

Infrared thermographers measure the thermal long-wave radiation sensed in their specific range (e.g., 7.5–13  $\mu\text{m}$  for FLIR A320), and they are factory-calibrated to output the temperature equivalent of the full thermal range (4–100  $\mu\text{m}$ ; Ross, 2012). A chain of reflections and absorptions of thermal radiant fluxes ( $L$ ;  $\text{W m}^{-2}$ ) affects the signal recorded by the sensor and requires consideration (Aubrecht et al., 2016; Incropera et al., 2006). The total radiant flux ( $L_{\text{camera}}$ ) received by the camera sensor is a combination of (a) the radiation emitted by the measured leaf/object  $L_{\text{obj}}$  with emissivity  $\varepsilon_{\text{obj}}$  extracted from the relevant pixels of infrared images, (b) the surface hemispherical background radiation reflected from the object  $L_{\text{bg}}$  with reflectance  $1 - \varepsilon_{\text{obj}}$ , with both of these components attenuated by the transmittance  $\tau$  of the air column between the object and the camera, and (c) the thermal radiation emitted by the air column between the object and the camera  $L_{\text{air}}$  emitting with  $1 - \tau$ . These effects are integrated in Eq. 1 and illustrated in Fig. 1:

$$L_{\text{camera}} = \tau\varepsilon_{\text{obj}}L_{\text{obj}} + \tau(1 - \varepsilon_{\text{obj}})L_{\text{bg}} + (1 - \tau)L_{\text{air}} \quad (1)$$

Note that in using Eq. 1, we assume a Lambertian object surface (i.e. a diffuse emission and reflection of  $L_{\text{bg}}$  on it; Kribus et al., 2003), and no scattering due to water droplets in the air (e.g. during fog). To obtain the correct object (leaf) temperature ( $T_{\text{obj}}$ ), Eq. 1 is used together with the IR camera reading ( $L_{\text{camera}}$ ) to solve for  $L_{\text{obj}}$ , which is then converted to temperature using the Stefan-Boltzmann law, and its constant,  $\sigma$  (Eq. 2). Note that  $L_{\text{obj}}$  is the blackbody equivalent emitted radiation of the leaf (i.e.  $\varepsilon_{\text{obj}} = 1$ ), since  $\varepsilon_{\text{obj}}$  is already applied in Eq. 1.

$$T_{\text{tot}} = \left( \frac{L_{\text{obj}}}{\sigma} \right)^{1/4} \quad (2)$$

Typically, infrared cameras calculate the object temperature  $T_{\text{obj}}$  internally using operator-provided fixed values of  $\varepsilon_{\text{obj}}$ ,  $L_{\text{bg}}$ ,  $L_{\text{air}}$  and  $\tau$  (FLIR, 2011). However, these variables vary significantly across time and surfaces, especially in field conditions. Accurate temperature estimates must rely in this case on post-processing of the preliminary measurements of the apparent temperature  $T_{\text{ap}}$  (i.e., with  $\tau$  and  $\varepsilon$  set to 1 in camera). To improve the uncertainty of

the temperature estimate, independent information on these variables can be obtained and applied as summarized below in our ‘dual-reference’ method taking both the systematic camera offset and  $L_{\text{bg}}$  into account.

**Correction for the systematic camera offset:** Thermal sensors suffer from systematic errors due to their sensitivity to environmental conditions (Kim et al., 2018). Kim et al. (2018) recommend using a reference plate with a high emissivity ( $\varepsilon_{\text{emiss}} \approx 1$ ) and its independently measured temperature for calibration. This routine provides a corrected apparent temperature ( $T_{\text{ap,cor}}$ ) that can substitute for  $T_{\text{ap}}$  in Eq. 1. This routine adjusts the thermal infrared readings to the reference temperature sensor used to measure this emissive plate. Note that if the final application includes a comparison to air temperature (as done here), cross-calibration of the temperature sensors of the calibration plate and the air is required to maintain high accuracy.

**Air column variables  $L_{\text{air}}$  &  $\tau$ :** The full equation used by infrared thermographers (Incropera et al., 2006; FLIR, 2011; Aubrecht et al., 2016) takes the air column between the camera and the object into account.  $L_{\text{air}}$  and  $\tau$  depend on factors such as air temperature, humidity and aerosol content (Gates, 2012). At a distance of  $<10$  m between the camera and the object, the error is  $\sim 0.5^\circ\text{C}$  (Faye et al., 2016). Therefore, it is reasonable to assume  $\tau \approx 1$  at a shorter distance (Aubrecht et al., 2016; Usamentiaga et al., 2014), and the right-hand term in Eq. 1 can be assumed to be practically zero.

**Emissivity  $\varepsilon$ :** The emissivity of the leaves and other surfaces involved in the measurements is often estimated from literature values, which can involve substantial uncertainty with a significant impact on temperature estimates (Richardson et al., 2020). Direct and high precision measurements of surface emissivity can be achieved in the lab, as we recently demonstrated using a home-made high precision system (Vishnevetsky et al., 2019), or for large enough samples in the field using the two-lid box method (Rubio et al., 2003).

**Background radiation  $L_{\text{bg}}$ :**  $L_{\text{bg}}$  is often ignored in infrared temperature measurements due to difficulties in measuring it near the leaves. However, as demonstrated here, it is probably a key factor in obtaining accurate temperature. Here we propose that this difficulty can be overcome by using a second calibration plate with a high reflectance ( $\varepsilon_{\text{refl}} \approx 0$ )

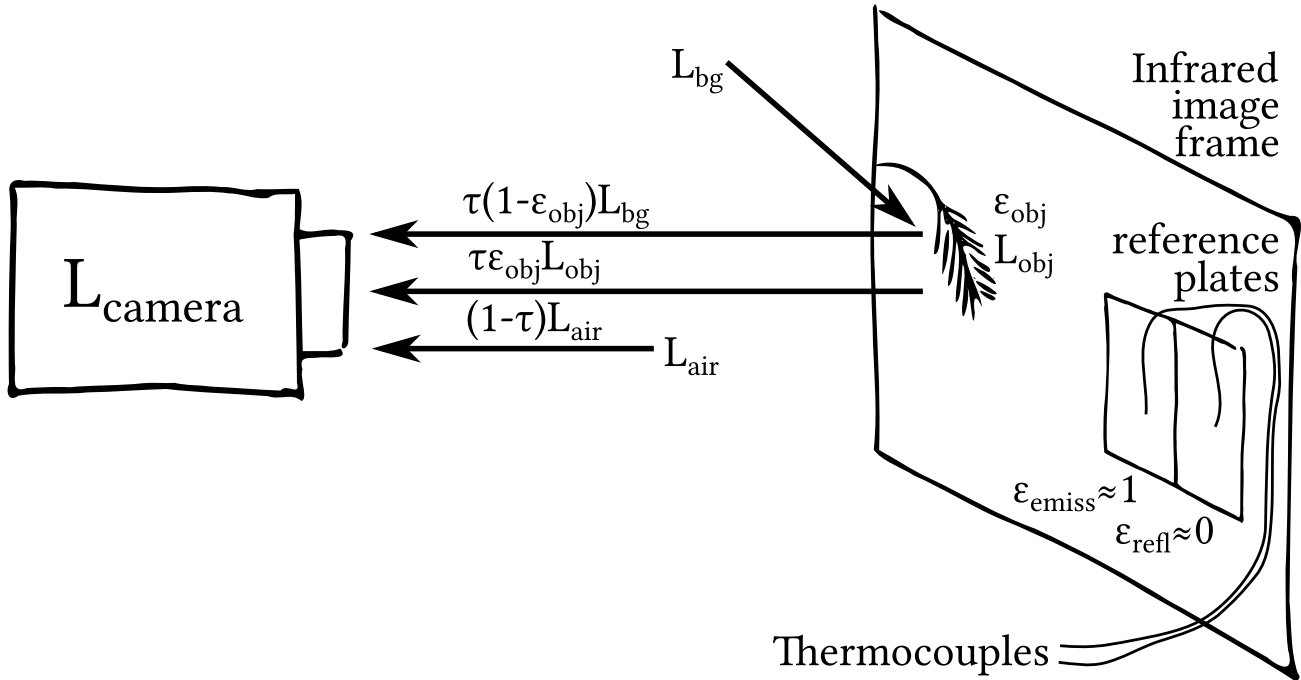

**Fig. 1.** Illustration of the total radiation  $L_{camera}$  and relevant terms received by an infrared thermographer as summarized in Eq. 1. The diagram also indicates the proposed reference plates and their built-in thermocouples (with low ( $\epsilon_{refl}$ ) and high ( $\epsilon_{emiss}$ ) emissivity) in the camera’s field of view that can be used to resolve the systematic camera offset and background thermal radiation ( $L_{bg}$ ), required to solve Eq. 1 for the object temperature, as demonstrated in this study

223 in the camera field of view (Fig. 1). Estimates can be  
 224 achieved by solving Eq. 1 for  $L_{bg}$  using the camera  
 225 reading of the thermal radiation originating from the  
 226 reflective calibration plate, its known emissivity and  
 227 its independently measured temperature.

## 228 2 Materials & Methods

### 229 2.1 Measurement Procedure

230 For the entire correction procedure of infrared tem-  
 231 perature measurements, the temperature of both  
 232 reference plates needs to be measured accurately and  
 233 independently, e.g. using calibrated thermocouples  
 234 or thermistors, thus providing  $T_{emiss}$  and  $T_{refl}$ , re-  
 235 spectively. For the continued discussion of the meth-  
 236 ods, the term ‘thermocouple’ is used and we assume  
 237  $\tau \approx 1$ . The following steps show our method’s calcu-  
 238 lation procedure of leaf temperature (Fig. 2). Note  
 239 that before any calculations can be done, the relevant  
 240 pixels containing each object (leaves, reference plates)  
 241 need to be identified and their apparent temperature  
 242 extracted from infrared images.

**In-situ calibration for systematic camera** 243  
**offset:** Due to the small drift and frequent calibra- 244  
 tion, we note that the systematic camera offset 245  
 follows a linear regression of the form of Eq. 3, where 246  
 the corrected apparent temperature of any surface 247  
 $T_{ap,cor}$  corresponds to the raw camera reading of the 248  
 apparent temperature  $T_{ap}$ , corrected for the camera 249  
 offset using parameters  $a$  and  $b$ : 250

$$T_{ap,cor} = aT_{ap} + b \quad (3)$$

251 The apparent and corrected temperatures of the  
 252 emissive plate are used for the calibration of the  
 253 camera, and the latter depends on measurements of  
 254  $L_{bg}$ . However, accurate measurements of  $L_{bg}$  using  
 255 a reflective plate also depend on  $a$  and  $b$ . Therefore,  
 256 a simple correlation between the temperature of the  
 257 emissive plate measured using a thermocouple and  
 258 the infrared camera is not sufficient for calibration.  
 259 Instead,  $a$  and  $b$  need to be applied to the  $T_{ap}$  of both  
 260 the reflective and emissive reference plates during the  
 261 calibration process. A simple search algorithm for  
 262  $a$  and  $b$  is presented in the supporting information  
 263 (Section S2) for a proof-of-concept (but this could  
 264 also be done in different ways).

## Calculation workflow of corrected leaf surface temperature

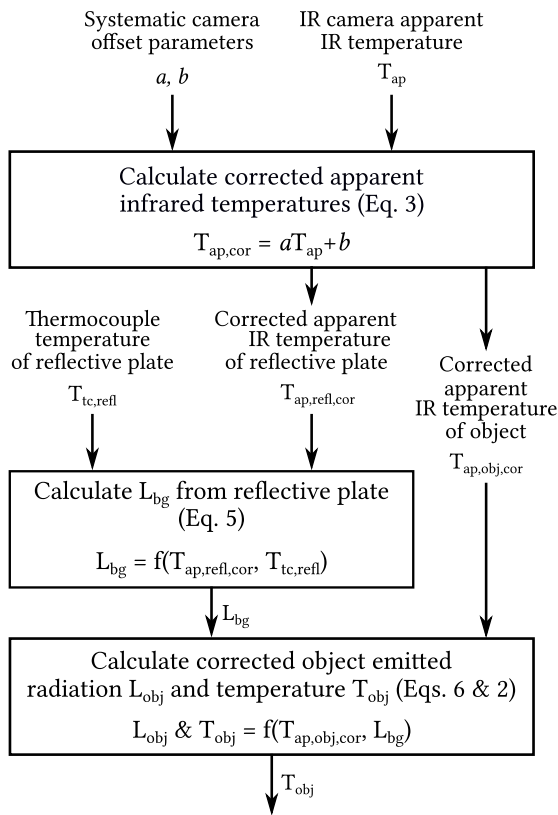

**Fig. 2.** Flowchart of the calculation procedure of infrared measurements of leaf surface temperature including the measurement and correction for the effect of  $L_{bg}$  using a reflective reference plate

265 **Camera-observed thermal radiation  $L_{camera}$ :**  
 266 The total longwave radiation corresponding to  $T_{ap,cor}$   
 267 measured at each pixel in the camera image,  $L_{camera}$ ,  
 268 is calculated for the entire image using the Stefan-  
 269 Boltzmann equation (Eq. 4), where  $\sigma$  is the Stefan-  
 270 Boltzmann constant and we assign  $\varepsilon_{camera} = 1$ .

$$L_{camera} = \varepsilon_{camera} \sigma T_{ap,cor}^4 \quad (4)$$

271 **Thermal background radiation  $L_{bg}$ :** Next,  
 272 Eq. 1 is re-arranged and solved for the background  
 273 longwave radiation  $L_{bg}$ , as shown in Eq. 5, using the  
 274 thermal radiation emitted by the reflective reference  
 275 plate ( $L_{refl}$ ) and received by the infrared camera (as  
 276 in Eq. 4:  $L_{camera,refl} = \varepsilon_{camera} \sigma T_{ap,refl,cor}^4$ ). The  
 277 emissivity of the reflective reference plate  $\varepsilon_{refl}$  is  
 278 known in Eq. 5, and  $L_{refl}$  is the blackbody-equivalent  
 279 radiation calculated from the independently meas-  
 280 ured reflective plate temperature  $T_{refl}$  (using a ther-  
 281 mocouple), i.e.  $L_{refl} = \sigma T_{refl}^4$ .

$$L_{bg} = \frac{L_{camera,refl} - \varepsilon_{refl} L_{refl}}{1 - \varepsilon_{refl}} \quad (5)$$

Note that in outdoors environments, it is com- 282  
 283 mon to assume that  $L_{bg}$  is diffuse, but this may be  
 284 unjustified, for example, when the sky's effective tem-  
 285 perature is much lower than ambient temperature.

**Leaf-emitted thermal radiation  $L_{obj}$ :** Eq. 1 is 286  
 287 then solved for the object longwave radiation  $L_{obj}$   
 288 Eq. 6.  $\varepsilon_{obj}$  is the object emissivity and  $L_{camera,obj} =$   
 289  $\sigma T_{ap,obj,cor}^4$  (Eq. 4).

$$L_{obj} = \frac{L_{camera,obj} - (1 - \varepsilon_{obj}) L_{bg}}{\varepsilon_{obj}} \quad (6)$$

Finally, the object temperature  $T_{obj}$  is obtained 290  
 291 by reversing the Stefan-Boltzmann equation (Eq. 2).

## 2.2 Lab emissivity measurements 292

The hemispherical directional emissivity (at a right 293  
 294 angle to the plates) of each reference plate and of  
 295 natural materials present in the Yatir forest (leaves,  
 296 branches, soil; Table 1) were measured in the lab at  
 297 an uncertainty of  $<0.5\%$  for  $\varepsilon > 0.90$  using a sys-  
 298 tem developed for measurements of natural materials  
 299 (Vishnevetsky et al., 2019).

**Table 1.** Mean hemispherical directional emissivity with 300  
 301 number of samples (N) and standard deviation of differ-  
 302 ent materials measured in the lab using the system by  
 Vishnevetsky et al. (2019). For an emissivity  $\varepsilon > 0.90$ ,  
 the uncertainty is  $\leq 0.5\%$  of the measured  $\varepsilon$ , for  $\varepsilon < 0.95$ ,  
 the uncertainty is  $\leq 0.4\%$ , for  $\varepsilon \leq 0.1$ , the uncertainty  
 is  $\sim 28.6\%$ . Note: Old fresh needles had an emissivity  
 $< 0.005$  higher than young fresh needles (values shown are  
 for the mean), and differences in needle water content  
 were insignificant.

| Sample Materials      | N | Emissivity | Std. Dev. |
|-----------------------|---|------------|-----------|
| Bark on thin branches | 4 | 0.896      | 0.014     |
| Emissive coating      | 1 | 0.977      |           |
| Reflective coating    | 1 | 0.023      |           |
| Pine needles (dry)    | 3 | 0.933      | 0.010     |
| Pine needles (fresh)  | 4 | 0.947      | 0.003     |
| Topsoil (Yatir)       | 4 | 0.933      | 0.006     |

## 2.3 Field site 300

All field measurements were done in the Yatir forest 301  
 302 research site, located in a *Pinus halepensis* afforest-

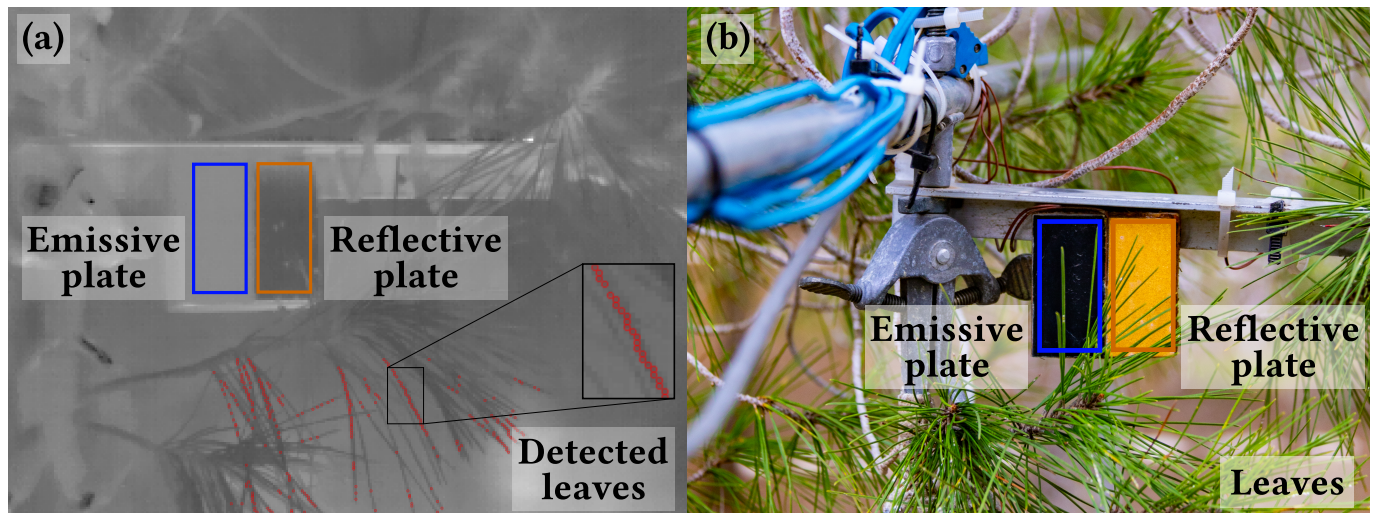

**Fig. 3.** (a) Example infrared image, where red points (cf. zoomed-in square) show examples of pixels identified as leaves by our automatic script (Muller and Dingjan, 2020) and (b) setup of the infrared camera's picture frame. Polygons show the reference plates used for camera offset correction through a known amount of emitted thermal radiation (emissive plate, blue) and background thermal radiation reflected into the IR camera (reflective plate, orange).

303 ation in the dry southern Mediterranean region, Is- 334  
304 rael (31°20'49"N; 35°3'7"E; altitude 650 m above sea 335  
305 level). Mean annual global radiation was  $238 \text{ W m}^{-2}$ , 336  
306 while average air temperatures for January and July 337  
307 are 10 and  $25.8^\circ\text{C}$  respectively, with a mean an- 338  
308 nual potential ET of 1600 mm, and mean annual 339  
309 precipitation of 285 mm (Rotenberg and Yakir, 2010; 340  
310 Tatarinov et al., 2016; Qubaja et al., 2019). Meas- 341  
311 urements were done between June 2018 and October 342  
312 2019. The research site includes an eddy covariance 343  
313 flux tower operating since 2000, whose above-canopy 344  
314 environmental sensors (15 m agl) include air tem- 345  
315 perature ( $^\circ\text{C}$ ), RH (%), and 4 channels of radiation 346  
316 ( $\text{W m}^{-2}$ ) with up- and downwelling shortwave (0– 347  
317 4000 nm; CM21, Kipp & Zonen B.V., Delft, The 348  
318 Netherlands) and longwave radiometers (4–50  $\mu\text{m}$ ; 349  
319 Eppley, Newport RI), both above (15 m) and below 350  
320 canopy ( $\sim 2$  m). 3D wind speed is measured at 18.7 m 351  
321 above ground, and  $\sim 7$  m above canopy ( $\text{m s}^{-1}$ ; R3- 352  
322 100, Gill Instruments, Lymington, United Kingdom), 353  
323 were used for auxiliary measurements of meteorologi- 354  
324 cal conditions during our measurement periods. 355

## 325 2.4 Sensor Setup & Data Processing

326 **IR camera deployment:** A setup was developed in 327  
328 order to accurately measure leaf surface temperatures 329  
329 under field conditions. It included an infrared cam- 330  
330 era (7.5–13  $\mu\text{m}$ ,  $320 \times 240$  px resolution; FLIR A320; 331  
331 FLIR Systems, Wilsonville, Oregon, United States 332  
332 with  $\tau$  and  $\varepsilon_{\text{camera}}$  were set to 1) together with 333  
333 emissive and a reflective reference plates. This setup 334  
334 was tested by deploying it in a natural environment 335

336 with fluctuating environmental conditions in a pine 337  
337 forest in Israel for a full year of operation. To ensure 338  
338 that twigs with measured needles don't move out of 339  
339 focus and cover entire pixels (pixels  $\sim 0.4$  mm wide 340  
340 compared to pine needles diameters of  $\sim 0.8$ –1 mm), 341  
341 an arm extending  $< 65$  cm from the infrared camera 342  
342 using a  $15^\circ$  lens held a few twigs and the reference 343  
343 plates at a fixed distance from the camera (Fig. 3). 344  
344 This also minimised wind motion and simplified leaf 345  
345 detection during infrared image analysis. 346

**Reference plates:** The two coated aluminium 347  
348 reference plates (plate size:  $5 \times 2.5 \text{ cm} \times 3 \text{ mm}$ ; mater- 349  
349 ial chosen for its high thermal conductivity) each 350  
350 contained a thin thermocouple at its centre, at 351  
351 0.5 mm distance from the surface, in a hole filled 352  
352 with thermally conductive grease drilled sideways 353  
353 into the plates to prevent disturbing the coated sur- 354  
354 face. 355

356 The plates were insulated by a piece of wood 2 cm 357  
357 thick on the back to prevent undesired heating from 358  
358 the environment. The emissive and reflective refer- 359  
359 ence plates employed a *Metal Velvet*<sup>TM</sup> coating (Acktar 360  
360 Ltd., Kiryat-Gat, Israel) and a coarse *Infragold*<sup>®</sup> 361  
361 coating (Labsphere Inc., North Sutton NH, USA), re- 362  
362 spectively. The coarse coating of the reflective plate 363  
363 produced diffuse reflection of incident background 364  
364 radiation, such that the image of the plate is uni- 365  
365 form for all angles of the plate surface relative to the 366  
366 camera. 367

368 The reflective plate was installed vertically in order 369  
369 to capture  $L_{bg}$  hemispherically, originating from 370  
370 364

365 above and below. Note that small differences in  
366 temperature due to fluctuations of the surface tem-  
367 perature of the reflective plate and the embedded  
368 thermocouple could introduce noise to  $L_{bg}$  when the  
369 emissivity of the surface is not sufficiently low, which  
370 led to large errors when we tested it using an un-  
371 coated aluminium plate in a test ( $\varepsilon \approx 0.3$ ). The  
372 purpose of the embedded thermocouple is to account  
373 for the small proportion of emitted thermal radiation  
374 from the reflective plate observed by the thermal  
375 camera, as its emissivity is not exactly zero.

376 **Data extraction from IR images:** A matrix  
377 of raw infrared temperatures were extracted from  
378 the FLIR infrared images using a Python script de-  
379 veloped based on an R script by Tattersal (2019).  
380 Regions of interest were scanned in horizontal lines  
381 to identify needle leaves and reference plates. A  
382 peak detection algorithm contained in SciPy (Vir-  
383 tanen et al., 2020) was used on each line to create a  
384 mask of valid pixels of each category: (a) To identify  
385 needles, a negative peak prominence (temperature  
386 minima) of a height of  $\frac{1}{3}$  of the total range of values  
387 in each line and a maximum width of 5 px yielded  
388 the desired leaf detection; (b) to identify reference  
389 plates, the junction of values between the ‘warm’  
390 emissive and the ‘cold’ reflective plate was identi-  
391 fied by calculating the first discrete difference along  
392 the horizontal line of data points, areas with a fixed  
393 width of 20 px around that junction were selected and  
394 peaks in those areas were removed (e.g. for leaves in  
395 front of the plates). The median, mean and standard  
396 deviations of all temperatures were calculated for  
397 all the pixels in each category of data (i.e. leaves  
398 and reference plates), but medians were used to re-  
399 duce the effect of obvious outliers. This provided a  
400 median temperature of needle-leaves on a twig, de-  
401 noted as ‘leaf’ temperature. The instantaneous data  
402 of each IR image was connected to air temperature  
403 measurements at the same time of measurement (see  
404 below).

405 This method limits leaf identification to conditions  
406 where the images are in focus and the background is  
407 warmer than leaves (92 % of measurements, major-  
408 ity of failures due to loss in camera focus), which is  
409 normally the case in our conditions due to the warm  
410 ground. To improve leaf detection, the infrared cam-  
411 era could theoretically be pointed up- or downward  
412 to get a clear difference to the sky or soil, but the  
413 hemispherical measurements of  $L_{bg}$  using a reflective  
414 plate would then not provide the  $L_{bg}$  coming from  
415 above or below. In the case of narrow needle-leaves  
416 where the leaf surface direction is not well defined, the

reference plates and the camera view frame should 417  
therefore be arranged vertically. For broad-leaves, 418  
they should be arranged parallel to the side of the 419  
leaf that is measured to capture the corresponding 420  
 $L_{bg}$ . The results of the leaf detection script were 421  
compared to manual sampling of leaf temperatures 422  
( $R^2 = 0.99$ ,  $P < .001$ ; Section S3), showing that it 423  
accurately extracts needle temperatures. 424

**In-situ camera offset correction:** The system- 425  
atic camera offset was calibrated for the entire dataset 426  
of ~28 000 measurements using the emissive plate’s 427  
night-time temperature, as recommended by Faye 428  
et al. (2016) to achieve the optimal field measurement 429  
accuracy. Due to the heat capacity of aluminium, 430  
the thermocouple inside the reference plate reacts 431  
slightly more slowly to fast surface temperature fluc- 432  
tuations than the IR camera, resulting from sud- 433  
den sun spots appearing on the surface of the plate. 434  
These result from changing shading during daytime 435  
due to branch motion in the canopy. The IR camera 436  
and thermocouple measurements used for calibra- 437  
tion were highly correlated ( $R^2 = 0.99$ ,  $P < .001$ , 438  
 $RMSE = 0.13$ ). Outliers resulting from sensor issues 439  
related to crashes of the infrared camera’s internal 440  
software, thermocouples, dust and humidity on the 441  
reference plates, or from rapid fluctuations of solar 442  
radiation leading to  $>\pm 2^\circ\text{C}$  differences between both 443  
reference plate thermocouples were removed ( $<1\%$  444  
of data). 445

**Air temperature measurements:** Thermo- 446  
couple measurements of both air and reference plate 447  
temperatures were logged on a CR1000 datalogger 448  
(Campbell Scientific Inc., Logan UT, USA). For pre- 449  
cise air temperature measurements, fine calibrated 450  
T-type thermocouples were installed in a radiation 451  
shield (Model 41003; R. M. Young Company, Tra- 452  
verse City MI, USA) 2–3 m away from the leaves 453  
at the same height as the camera. Calibration of 454  
all thermocouples was done in stirred water of a 455  
known uniform temperature to remove differences 456  
of individual thermocouple junctions. At  $\sim 30^\circ\text{C}$  in 457  
air, the calibrated thermocouples showed the same 458  
temperature within  $0.1^\circ\text{C}$  (Section S6). 459

A set of fine conifer needle surface temperat- 460  
ure thermocouples ( $\Delta\text{LA-C}$ , Ecomatik, Munich, 461  
Germany) and a fine air temperature thermistor 462  
(GA10K3MCD1, TE Connectivity, Schaffhausen, 463  
Switzerland) were installed on an adjacent twig for 464  
comparison to IR readings. No correlation was found 465  
between them because thermocouple junctions were 466  
too exposed to the environmental air (see Section S4). 467

### 3 Results

**Camera offset correction:** Infrared cameras with uncooled sensors, such as the FLIR A320, are prone to sensor drift due to environmental temperature fluctuations. FLIR mentions an inaccuracy of  $\pm 2^\circ\text{C}$  for recently calibrated cameras (FLIR, 2011). In our setup, the systematic camera offset was estimated weekly using night-time field data of the emissive reference plate and a simple search algorithm for the linear equation parameters (see Section S2). Based on this approach, a relatively large camera offset from calibrated thermocouples was estimated at  $-2.25 \pm 0.53^\circ\text{C}$  (intercept of correction equation; slope:  $1.04 \pm 0.03^\circ\text{C}$ ). Repeating this calibration weekly indicated a small weekly drift (intercept:  $0.03 \pm 0.62^\circ\text{C}$ , slope:  $-0.002 \pm 0.040^\circ\text{C}$ ) around the large original correction. This data shows the importance of regular corrections for the camera offset. Notably, while here we encounter a large initial offset and relatively small subsequent drifts, the extent of such correction is likely to vary across locations and ambient conditions.

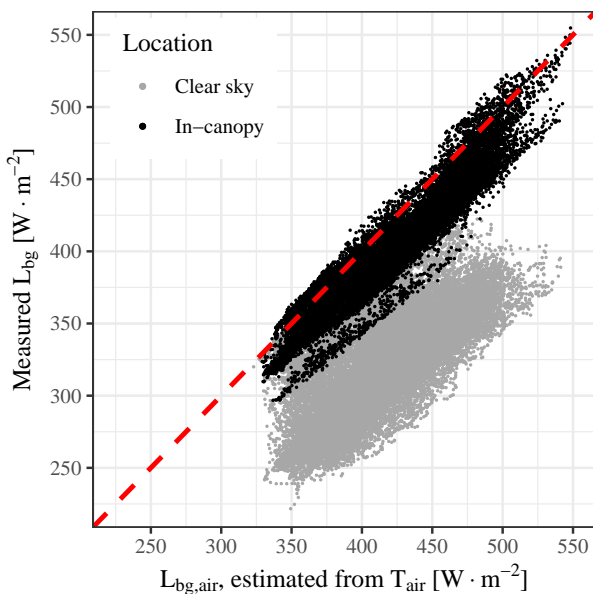

**Fig. 4.** Estimates of background thermal radiation ( $L_{bg}$ ) from air temperature ( $T_{air}$ ) using a simple calculation ( $L_{bg,air} = \sigma T_{air}^4$ ), compared to measurements under a clear sky (grey) and using our reflective plate of a vertical hemisphere within the canopy (black), showing that  $L_{bg,air}$  is consistently overestimated. Air temperature over-estimated  $L_{bg}$  by  $\sim 50 \text{ W m}^{-2}$  within the canopy and  $\sim 100 \text{ W m}^{-2}$  under a clear sky

**$L_{bg}$  measurements:**  $L_{bg}$  was estimated using the reflective plate by solving Eq. 5 as detailed in the Methods section. These measurements are critical to improve the accuracy of the temperature estim-

ates. Our values of  $L_{bg}$  using the integrated reflective plate were compared to an  $L_{bg}$  estimation based air temperature (using the Stefan-Boltzmann equation:  $L_{bg,air} = \sigma T_{air}^4$ ) as often used when  $L_{bg}$  measurements are not available. Under a clear sky,  $L_{bg,air}$  consistently over-estimated  $L_{bg}$  by up to  $100 \text{ W m}^{-2}$  (Fig. 4,  $R^2 = 0.36$ ,  $P < .001$ ,  $RMSE = 27.58 \text{ W m}^{-2}$ ). It improved within the canopy but still over-estimated  $L_{bg}$  by up to  $50 \text{ W m}^{-2}$  in most cases (Fig. 4,  $y = 0.92x - 14.92$ ,  $R^2 = 0.90$ ,  $P < .001$ ,  $RMSE = 13.76 \text{ W m}^{-2}$ ). For an over-estimation of  $50 \text{ W m}^{-2}$ , resulting temperature errors can reach  $0.5^\circ\text{C}$  or  $>1^\circ\text{C}$  for  $\varepsilon = 0.95$  or  $\varepsilon = 0.90$ , respectively (Fig. 4), or twice that under a clear sky. Even using an empirical correlation, temperature errors could easily exceed  $0.5^\circ\text{C}$  ( $\varepsilon = 0.90$ ) due to the large range of  $L_{bg,air}$  estimates.

**Sensitivity to background radiation:** Assessing the effects of variations in  $L_{bg}$  on IR temperature estimates for the  $300\text{--}550 \text{ W m}^{-2}$  range naturally observed at our field site was demonstrated by the sensitivity analysis shown in Fig. 5. The temperature error could be  $\pm 1.5^\circ\text{C}$  for needle-leaves and  $\pm 3.5^\circ\text{C}$  for branches or soil, depending on the object's surface temperature, emissivity and  $L_{bg}$ . Note that leaf temperatures are overestimated when  $L_{bg}$  is lower than the thermal radiation received by the camera, and underestimated otherwise. Such effects clearly limit any attempt to accurately assess  $\Delta T_{leaf-air}$  under field conditions without an accurate measurement of  $L_{bg}$  due to its large range (e.g., during our measurement period: clear sky:  $222\text{--}351 \text{ W m}^{-2}$ ; vertical hemisphere in-canopy from reflective reference plate, integrated from canopy, sky and soil:  $299\text{--}552 \text{ W m}^{-2}$ ).

**The importance of our 'dual-reference':** While in the previous section we assessed the significance of variations in  $L_{bg}$ , here we quantitatively assess the comparison between apparent IR temperatures readings ( $T_{ap}$ ) corrected using our method, which accounts for both the systematic camera offset and the reflected  $L_{bg}$  (labelled as 'Method 1' in Fig. 6), and the previously used method using a correlation to a single emissive reference plate ('Method 2', according to Eq. 3), for an example of measured data (For conceptual data, see Section S7). This sensitivity analysis shows that a reference temperature (from 'Method 1') of  $32.5^\circ\text{C}$  with  $\varepsilon = 0.90$  can correspond to a  $31.6\text{--}32.6^\circ\text{C}$  range for the observed  $L_{bg}$  range when only an emissive reference plate is used (Fig. 6). For a higher emissivity of 0.95, the inaccuracy of method 2 is smaller, i.e. a



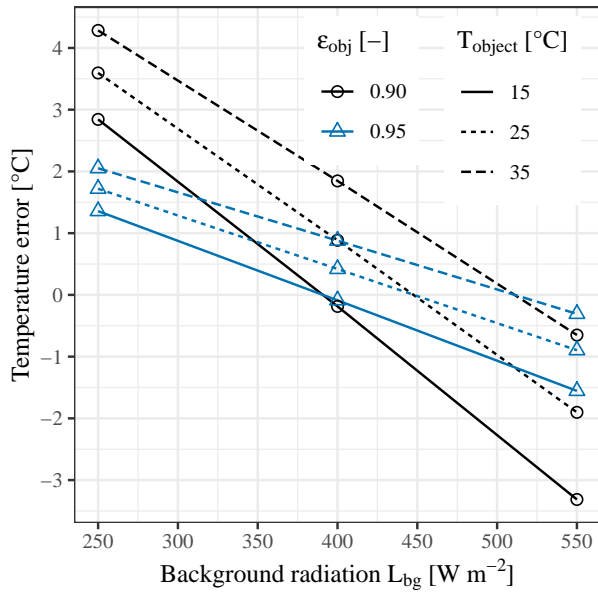

**Fig. 5.** Effect of apparent object surface temperature detected by an IR camera ( $T_{object}$ ; line type), object emissivity ( $\epsilon_{obj}$ ; colour/shape) and background thermal radiation ( $L_{bg}$ ) on infrared temperature error [°C] in field conditions, using  $\epsilon_{obj}$  of 0.95 (e.g. leaves) and 0.90 (e.g. branches), and  $L_{bg}$  in field conditions ranging from 300–550  $\text{W m}^{-2}$ , with  $T_{object}$  ranging from 15–35 °C

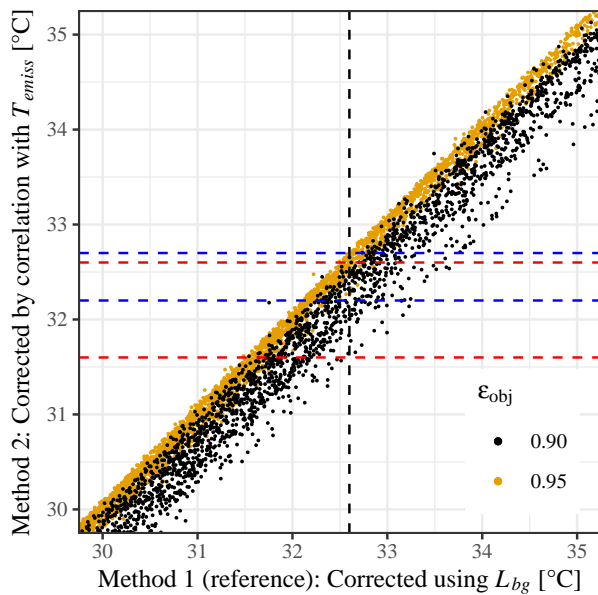

**Fig. 6.** Comparison between apparent IR temperatures correction methods based on our ‘dual-reference’ method, accounting for both the reflected  $L_{bg}$  and a systematic camera offset (x axis; ‘Method 1’, considered the reference), and using a correlation to a single emissive reference plate (y axis; ‘Method 2’; previously used), for IR measurements from 15–35 °C with an  $L_{bg}$  of 300–550  $\text{W m}^{-2}$  for 2 materials of  $\epsilon = 0.90$  and 0.95 (colours). Dashed horizontal lines show the range of  $T$  in method 2 for a reference  $T = 32.5$  °C (dashed black), for  $\epsilon = 0.90$  (red) and  $\epsilon = 0.95$  (blue)

range of 32.2–32.7 °C in (Fig. 6). This sensitivity analysis demonstrates the importance of taking  $L_{bg}$  into account even for materials with a high emissivity ( $\epsilon \approx 0.95$ ), such as leaves, and it shows that our method improved the measurement accuracy considerably beyond what is possible with just an emissive reference plate.

**Accuracy of leaf and leaf-to-air temperature measurements:** To achieve the accuracy required to assess the leaf temperature ( $T_{leaf}$ ) and, in turn, leaf-to-air temperature differences ( $\Delta T_{leaf-air}$ ) under field conditions, our ‘dual-reference’ measurement system used continuous  $L_{bg}$  measurements and camera calibration (see Methods).

The total uncertainty of our method was calculated from the combined errors of each sensor using the log derivative method (cf. Section S1; Fritschen and Gay, 2012). Table 2 shows the resulting uncertainty of relevant variables at a leaf temperature  $T_{obj} = 30$  °C. The uncertainty of  $T_{obj}$  (leaf or other object) is estimated at  $\pm 0.23$  °C in our conditions (ambient temperature 10–40 °C; Fig. S1.1) and that of  $\Delta T_{leaf-air}$  to  $\pm 0.25$  °C.

**Table 2.** Total resulting uncertainties of background thermal radiation ( $L_{bg}$ ), object/leaf-emitted thermal radiation ( $L_{obj}$ ), object/leaf surface temperature ( $T_{obj}$ ) and  $\Delta T_{leaf-air}$ , at object/leaf surface temperature  $T_{obj} = 30 \pm 0.05$  °C, assuming and object/leaf emissivity  $\epsilon_{obj} = 0.95 \pm 0.004$ ,  $\epsilon_{emiss} = 0.95 \pm 0.004$ ,  $\epsilon_{refl} = 0.023 \pm 0.007$ ,  $T_{tc} = \pm 0.1$  °C and systematic camera offset corrected by  $T_{ap,cor} = 1.0221 T_{ap} - 1.8545$

| Value                 | Uncertainty | Unit              |
|-----------------------|-------------|-------------------|
| $L_{bg}$              | $\pm 3.44$  | $\text{W m}^{-2}$ |
| $L_{obj}$             | $\pm 1.32$  | $\text{W m}^{-2}$ |
| $T_{obj}$             | $\pm 0.23$  | °C                |
| $\Delta T_{leaf-air}$ | $\pm 0.25$  | °C                |

**Implications to field studies:** The implications of our integrated ‘dual-reference’ approach to field studies of  $T_{leaf}$  and  $\Delta T_{leaf-air}$  is demonstrated by our measurements in the study site within the canopy (in 5 m height in the middle of the tree canopy) from the summer of 2018 to that of 2019. From Nov. 2018 to June 2019, the setup was kept in the same location, but exposed to large diurnal and seasonal fluctuations, including the rainy winter to the hot and dry summer. Measurements were grouped in bins of 100  $\text{W m}^{-2}$  of incoming solar radiation for the analysis (Fig. 7). Night-time temperatures were as much as 15 °C lower than daytime, and the incoming solar radiation mostly remained below 800  $\text{W m}^{-2}$  due to some partial canopy shading (while above-canopy

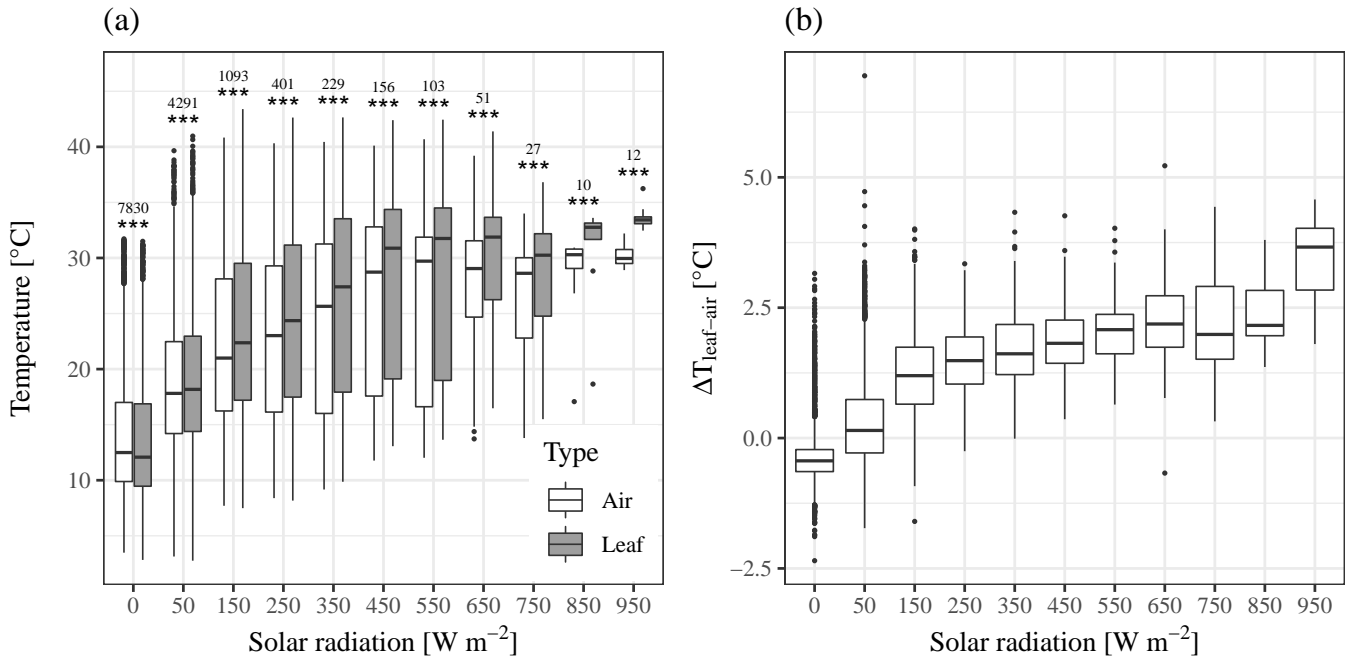

**Fig. 7.** Temperatures in bins of 100 W m<sup>-2</sup> of solar radiation for November 2018 – June 2019 of (a) Leaf and air temperatures with significance of differences between them and number of paired measurements, as well as (b) leaf-to-air temperature differences  $\Delta T_{leaf-air}$ . Paired *t*-tests of leaf and air temperature showed significant differences in all bins, and  $\Delta T_{leaf-air}$  is significantly larger than zero in bins  $>200$  W m<sup>-2</sup>

584 SWR reached  $>1000$  W m<sup>-2</sup>). Therefore, bins above  
 585 this value contained very few measurements ( $n < 20$ ).  
 586 At night,  $\Delta T_{leaf-air}$  dropped below zero, most likely  
 587 due to radiative and evaporative cooling of the leaves  
 588 in the absence of incoming solar radiation. The results  
 589 reported in Fig. 7 demonstrate the large seasonal  
 590 temperature range of about 30 °C at the field site,  
 591 and the order of magnitude smaller  $\Delta T_{leaf-air}$  val-  
 592 ues of about  $1.46 \pm 0.73$  °C (bins  $>200$  W m<sup>-2</sup>). In  
 593 spite of these challenging conditions, the differences  
 594 between leaf and air temperature were found to be  
 595 significant in each bin in paired *t*-tests ( $P < .001$ ;  
 596 Fig. 7a) and on average,  $\Delta T_{leaf-air}$  differed signifi-  
 597 cantly from zero ( $> 1\sigma$ ; bins  $>200$  W m<sup>-2</sup>; Fig. 7b).  
 598 These results clearly show that measurements at an  
 599 uncertainty of  $\pm 0.25$  °C are required to capture  $T_{leaf}$   
 600 sufficiently accurately and, in turn, the identified  
 601 small but significant  $\Delta T_{leaf-air}$  values, in spite of  
 602 the large variability in background conditions of this  
 603 forest ecosystem.

## 604 4 Discussion

605 Accurate measurements of leaf temperature are crucial  
 606 to understand many biochemical and biogeophysical  
 607 processes, but remain challenging, particularly  
 608 under field conditions. A number of recent stud-

ies have focussed on using thermal infrared cameras  
 (Still et al., 2019 and references therein), but those  
 require corrections that are difficult to make, such as  
 for the emissivity of the measured materials (Richard-  
 son et al., 2020) and for the background radiation,  
 which is subject to large fluctuations in natural envi-  
 ronments (Still et al., 2019; Aubrecht et al., 2016),  
 as well as systematic camera drift.

The results of this study identify several critical  
 factors that limit infrared-based temperature meas-  
 urements and demonstrate ways to overcome these  
 limitations to obtain the precision required for the  
 study of  $T_{leaf}$  and  $\Delta T_{leaf-air}$  under field conditions.  
 First, while direct measurement of emissivity is chal-  
 lenging, field methods (Rubio et al., 2003) and lab-  
 scale high precision systems (Vishnevetsky et al.,  
 2019) can be constructed and used to identify vari-  
 ations in  $\epsilon$  values of plant materials. Second, infrared  
 measurements are restricted by the camera accuracy  
 without calibration, i.e. 1–2 °C (Kim et al., 2016,  
 2018). To reduce this error, calibration of the IR  
 camera using an emissive reference plate is typically  
 recommended, although that alone does not allow  
 the error to drop below  $\sim 1$  °C (Aubrecht et al., 2016).  
 Third, significant variations in background thermal  
 radiation ( $L_{bg}$ ) under field conditions can lead to in-  
 accuracies of  $\sim 1.5$  or  $\sim 3.5$  °C in surface temperature  
 for  $\epsilon_{obj} = 0.95$  or 0.90, respectively (Fig. 5). Clearly,

637 both the systematic camera offset and the effect of  
638  $L_{bg}$  must be taken into account.

639 A novel ‘dual-reference’ method was developed to  
640 overcome these issues in field measurements. The  
641 systematic thermal camera offset was corrected using  
642 a highly emissive reference plate with negligible ef-  
643 fects of  $L_{bg}$ , as previously suggested (Aubrecht et al.,  
644 2016). Our results show the importance of regular  
645 corrections for the camera offset, and while this was  
646 done weekly in the present study, a daily calibra-  
647 tion might be advisable. Measurements of  $L_{bg}$  were  
648 achieved using a IR camera readings of a highly re-  
649 flective reference plate (7.5–13  $\mu\text{m}$ ). Furthermore,  
650 the correlation between these  $L_{bg}$  measurements and  
651 a commercial full-range sensor (4–100  $\mu\text{m}$ ; Section S5)  
652 allows for a high level of confidence in our method  
653 to sense  $L_{bg}$ . The temperatures of both reference  
654 plates were measured continuously using accurately  
655 calibrated thermocouples.

656 Measurements of non-contact leaf surface temper-  
657 ature has been difficult in the past because of the  
658 small differences between leaf and air temperatures  
659 ( $<4^\circ\text{C}$ ) in the high seasonal and diurnal variability of  
660 field conditions (here:  $\sim 10\text{--}40^\circ\text{C}$ ). Our system was  
661 deployed for  $\sim 2$  years in rough field conditions, requir-  
662 ing only minimal maintenance (cleaning the camera  
663 lens and two reference plates). Using it, significant  
664 leaf-to-air temperature differences were determined  
665 across a wide range of environmental conditions. Im-  
666 portantly, while the magnitude of  $\Delta T_{leaf-air}$  was  
667 small, it was significantly different from zero based  
668 on the precision achieved here (Fig. 7). Since the  
669 standard deviation of  $\Delta T_{leaf-air}$  was larger than the  
670 measurement uncertainty, the level of accuracy of  
671 our system is sufficiently robust to measure  $T_{leaf}$  and  
672  $\Delta T_{leaf-air}$  in field conditions such as ours. Further-  
673 more, our system provided long-term measurements  
674 at a high accuracy and spatial and temporal resolu-  
675 tions: with our IR camera (resolution:  $320 \times 240$  px;  
676  $15^\circ$  lens) and a distance to the leaves of  $<65$  cm,  
677 pixels were  $\sim 0.4$  mm wide, which allowed for meas-  
678 urements of conifer needles (diameter  $\sim 0.8\text{--}1$  mm) or  
679 even parts thereof (Fig. 3). Our method can prove  
680 important in providing accurate field measurements  
681 for an improved understanding of leaf physiological  
682 processes and models (Muller et al., 2021, submit-  
683 ted).

684 A number of caveats or potential improvements  
685 should be noted when using thermal infrared tem-  
686 perature measurements: (a) While broad-leaf sur-  
687 face temperature measurements seem easier due to

their size, their emissivity can be different on both  
sides. (b) If the angle of the leaf towards the camera  
changes, e.g. from wind, the corresponding direc-  
tional emissivity has to be known to ensure accurate  
measurements. (c) Measurements using our pro-  
posed setup are mostly limited by the accuracy of  
the reference plate thermocouples and could be fur-  
ther improved if more precise sensors are available.  
(d) An aspirated radiation shield could improve air  
temperature measurements. (e) The distance of the  
camera from the leaves has to be chosen appropriately  
to obtain pixel size smaller than the leaf dimension  
( $<1$  mm diameter in the present study) to avoid sig-  
nal contamination (e.g., from sky, soil and branches).  
(f) Finally, we recommend the usage of a solar ra-  
diation sensor near exposed thermocouple junctions  
due to the effect of sunlight on their readings.

In conclusion, we demonstrate that accurate tem-  
perature measurements ( $\pm 0.23^\circ\text{C}$  for  $T_{leaf}$  and  
 $\pm 0.25^\circ\text{C}$  for  $\Delta T_{leaf-air}$ ) can be achieved on a routine  
basis in field conditions even for small-dimension  
needle leaves, and our results demonstrate the ne-  
cessity for accurate measurements of  $L_{bg}$  near the  
leaves due to large fluctuations in field conditions.

## Nomenclature

### Symbols

|               |                                  |     |
|---------------|----------------------------------|-----|
| $\sigma$      | Stefan-Boltzman constant         | 714 |
| $\tau$        | Transmissivity of the air column | 715 |
| $\varepsilon$ | Emissivity                       | 716 |
| $a, b$        | slope, intercept                 | 717 |
| $L$           | Thermal radiant flux             | 718 |

### Subscripts

|               |                                                     |     |
|---------------|-----------------------------------------------------|-----|
| <i>air</i>    | Air column between object and IR camera             | 720 |
| <i>ap</i>     | Apparent, infrared, temperature                     | 721 |
| <i>bg</i>     | Thermal background radiant flux                     | 722 |
| <i>camera</i> | Camera-received radiation                           | 723 |
| <i>cor</i>    | Corrected, i.e. after calibration                   | 724 |
| <i>emiss</i>  | Emissive plate ( $\varepsilon_{emiss} \approx 1$ )  | 725 |
| <i>ir</i>     | Infrared                                            | 726 |
| <i>obj</i>    | Measured object of interest                         | 727 |
| <i>refl</i>   | Reflective plate ( $\varepsilon_{refl} \approx 0$ ) | 728 |

## 729 Acknowledgements

730 The authors are grateful to Meir Shalev for his help  
731 with the IR camera and Revital Weic for her manual  
732 sampling of needle-leaf temperature.

733 This study was supported by JNF-KKL (10-10-920-  
734 19), the Israel Science Foundation (ISF#1976/17), a  
735 research grant from the *Yotam project* and the Uzi  
736 Yemin grant from the *Weizmann Institute Sustain-  
737 ability and Energy Research Initiative*.

## 738 Author contributions

739 The study was conceived by JM, ER, IV and DY;  
740 JM developed the IR system, and carried out the  
741 measurements; JM analysed the data with help of  
742 FT and TD under the guidance of AK, ER and DY;  
743 JM, AK, ER and DY contributed to the writing.

## 744 Code and data availability

745 Software scripts developed for the analysis are openly  
746 available as follows:

- 747 • Script to automatically trigger an infrared cam-  
748 era through a LAN interface: ‘FLIR-A320-  
749 control’ at [https://doi.org/10.5281/zenodo.  
750 4088156](https://doi.org/10.5281/zenodo.4088156), reference (Muller, 2020)
- 751 • Python script to extract raw temperature data  
752 from FLIR infrared images: ‘IR-data-extraction’  
753 at <https://doi.org/10.5281/zenodo.4104314>, ref-  
754 erence (Muller and Segev, 2020)
- 755 • Script to detect pine needles and reference  
756 plates in infrared images: ‘Pine-needle-thermal-  
757 detection’ at [https://doi.org/10.5281/zenodo.  
758 4284621](https://doi.org/10.5281/zenodo.4284621), reference (Muller and Dingjan, 2020)

## 759 References

760 Aubrecht, D. M., Helliker, B. R., Goulden, M. L.,  
761 Roberts, D. A., Still, C., and Richardson, A. D.  
762 Continuous, long-term, high-frequency thermal  
763 imaging of vegetation: Uncertainties and recom-  
764 mended best practices. *Agricultural and Forest*

*Meteorology*, 228–229:315–326, November 2016. 765  
doi:10.1016/j.agrformet.2016.07.017. 766

Baldocchi, D. and Penuelas, J. The physics and 767  
ecology of mining carbon dioxide from the atmo- 768  
sphere by ecosystems. *Global Change Biology*, 25 769  
(4):1191–1197, 2019. doi:10.1111/gcb.14559. 770

Bigler, C. and Bugmann, H. Climate-induced shifts 771  
in leaf unfolding and frost risk of European trees 772  
and shrubs. *Scientific Reports*, 8(1):9865, June 773  
2018. doi:10.1038/s41598-018-27893-1. 774

Birami, B., Gattmann, M., Heyer, A. G., Grote, 775  
R., Arneith, A., and Ruehr, N. K. Heat Waves 776  
Alter Carbon Allocation and Increase Mortality 777  
of Aleppo Pine Under Dry Conditions. *Fron- 778  
tiers in Forests and Global Change*, 1, 2018. 779  
doi:10.3389/ffgc.2018.00008. 780

Chaves, M. M., Costa, J. M., Zarrouk, O., Pin- 781  
heiro, C., Lopes, C. M., and Pereira, J. S. 782  
Controlling stomatal aperture in semi-arid re- 783  
gions—The dilemma of saving water or being 784  
cool? *Plant Science*, 251:54–64, October 2016. 785  
doi:10.1016/j.plantsci.2016.06.015. 786

Doughty, C. E. and Goulden, M. L. Are tropical 787  
forests near a high temperature threshold? *Journal 788  
of Geophysical Research: Biogeosciences*, 113(G1), 789  
2008. doi:10.1029/2007JG000632. 790

Drake, J. E., Tjoelker, M. G., V\arhammar, A., 791  
Medlyn, B. E., Reich, P. B., Leigh, A., Pfausch, S., 792  
Blackman, C. J., López, R., and Aspinwall, M. J. 793  
Trees tolerate an extreme heatwave via sustained 794  
transpirational cooling and increased leaf thermal 795  
tolerance. *Global change biology*, 2018. 796

Faye, E., Dangles, O., and Pincebourde, S. Distance 797  
makes the difference in thermography for ecolo- 798  
gical studies. *Journal of Thermal Biology*, 56:1–9, 799  
February 2016. doi:10.1016/j.jtherbio.2015.11.011. 800

FLIR. FLIR A3xx series - User’s manual. Publ. No. 801  
T559498 Rev. a547, FLIR, July 2011. 802

Fritschen, L. J. and Gay, L. W. *Environmental In- 803  
strumentation*. Springer Science & Business Media, 804  
December 2012. ISBN 978-1-4612-6205-3. 805

Fuchs, M. Infrared measurement of canopy temperat- 806  
ure and detection of plant water stress. *Theoretical 807  
and Applied Climatology*, 42(4):253–261, December 808  
1990. doi:10.1007/BF00865986. 809

Gates, D. M. *Biophysical ecology*. Courier Corpora- 810  
tion, 2012. 811

- 812 Gates, D. M., Alderfer, R., and Taylor, 860  
813 E. Leaf Temperatures of Desert Plants. 861  
814 *Science*, 159(3818):994–995, March 1968.  
815 doi:10.1126/science.159.3818.994.
- 816 Incropera, F. P., DeWitt, D. P., Bergman, T. L.,  
817 and Lavine, A. S. *Fundamentals of Heat and Mass*  
818 *Transfer*. John Wiley & Sons, Hoboken, NJ, 6th edi-  
819 tion edition, March 2006. ISBN 978-0-471-45728-2.
- 820 Jones, H. G., Serraj, R., Loveys, B. R., Xiong, L.,  
821 Wheaton, A., Price, A. H., Jones, H. G., Serraj, R.,  
822 Loveys, B. R., Xiong, L., Wheaton, A., and Price,  
823 A. H. Thermal infrared imaging of crop canop-  
824 ies for the remote diagnosis and quantification of  
825 plant responses to water stress in the field. *Func-*  
826 *tional Plant Biology*, 36(11):978–989, November  
827 2009. doi:10.1071/FP09123.
- 828 Kim, Y., Still, C., Hanson, C. V., Kwon, H.,  
829 Greer, B. T., and Law, B. E. Canopy skin  
830 temperature variations in relation to climate,  
831 soil temperature, and carbon flux at a ponder-  
832 osa pine forest in central Oregon. *Agricultural*  
833 *and Forest Meteorology*, 226–227:161–173, October  
834 2016. doi:10.1016/j.agrformet.2016.06.001.
- 835 Kim, Y., Still, C., Roberts, D. A., and Goulden, M. L.  
836 Thermal infrared imaging of conifer leaf temperat-  
837 ures: Comparison to thermocouple measurements  
838 and assessment of environmental influences. *Agri-*  
839 *cultural and Forest Meteorology*, 248:361–371, Janu-  
840 ary 2018. doi:10.1016/j.agrformet.2017.10.010.
- 841 Kribus, A., Vishnevetsky, I., Rotenberg, E., and  
842 Yakir, D. Systematic errors in the measure-  
843 ment of emissivity caused by directional effects.  
844 *Applied Optics*, 42(10):1839–1846, April 2003.  
845 doi:10.1364/AO.42.001839.
- 846 Leigh, A., Sevanto, S., Ball, M. C., Close, J. D., Ells-  
847 worth, D. S., Knight, C. A., Nicotra, A. B., and Vo-  
848 gel, S. Do thick leaves avoid thermal damage in crit-  
849 ically low wind speeds? *New Phytologist*, 194(2):  
850 477–487, 2012. doi:[https://doi.org/10.1111/j.1469-](https://doi.org/10.1111/j.1469-8137.2012.04058.x)  
851 [8137.2012.04058.x](https://doi.org/10.1111/j.1469-8137.2012.04058.x).
- 852 Leigh, A., Sevanto, S., Close, J. D., and Nicotra,  
853 A. B. The influence of leaf size and shape on  
854 leaf thermal dynamics: does theory hold up under  
855 natural conditions? *Plant, cell & environment*, 40  
856 (2):237–248, 2017.
- 857 Leuzinger, S. and Körner, C. Tree species di-  
858 versity affects canopy leaf temperatures in a  
859 mature temperate forest. *Agricultural and*  
*Forest Meteorology*, 146(1):29–37, September 2007. 860  
doi:10.1016/j.agrformet.2007.05.007. 861
- Leuzinger, S., Vogt, R., and Körner, C. Tree surface 862  
temperature in an urban environment. *Agricul-* 863  
*tural and Forest Meteorology*, 150(1):56–62, Janu- 864  
ary 2010. doi:10.1016/j.agrformet.2009.08.006. 865
- Long, S. P., Humphries, S., and Falkowski, P. G. Pho- 866  
toinhibition of photosynthesis in nature. *Annual* 867  
*review of plant biology*, 45(1):633–662, 1994. 868
- Long, S. P., Ainsworth, E. A., Leakey, A. 869  
D. B., Nösberger, J., and Ort, D. R. 870  
Food for Thought: Lower-Than-Expected Crop 871  
Yield Stimulation with Rising CO<sub>2</sub> Concentra- 872  
tions. *Science*, 312(5782):1918–1921, June 2006. 873  
doi:10.1126/science.1114722. 874
- Loomis, W. E. Absorption of Radiant En- 875  
ergy by Leaves. *Ecology*, 46(1-2):14–17, 1965. 876  
doi:<https://doi.org/10.2307/1935253>. 877
- Maimaitijiang, M., Sagan, V., Sidike, P., Hart- 878  
ling, S., Esposito, F., and Fritschi, F. B. Soy- 879  
bean yield prediction from UAV using multimodal 880  
data fusion and deep learning. *Remote Sens-* 881  
*ing of Environment*, 237:111599, February 2020. 882  
doi:10.1016/j.rse.2019.111599. 883
- Maseyk, K. S. *Ecophysiological and phenolo-* 884  
*gical aspects of Pinus halepensis in an arid-* 885  
*Mediterranean environment*. Ph.D., The Weiz- 886  
mann Institute of Science (Israel), Israel, 887  
2006. URL [https://search.proquest.com/docview/](https://search.proquest.com/docview/304955792/citation/84F5442BDD884B15PQ/1) 888  
[304955792/citation/84F5442BDD884B15PQ/1](https://search.proquest.com/docview/304955792/citation/84F5442BDD884B15PQ/1). 889
- Minkina, W. and Dudzik, S. *Infrared Thermography:* 890  
*Errors and Uncertainties*. John Wiley & Sons, 891  
September 2009. ISBN 978-0-470-68224-1. 892
- Muller, J. D. FLIR-A320-control: Tool to remotely 893  
focus and trigger a FLIR A320 infrared camera, 894  
October 2020. URL [https://zenodo.org/record/](https://zenodo.org/record/4088156) 895  
[4088156](https://zenodo.org/record/4088156). 896
- Muller, J. D. and Dingjan, T. Pine-needle-thermal- 897  
detection: Tool to detect pine needles in thermal 898  
images, November 2020. URL [https://zenodo.org/](https://zenodo.org/record/4284621) 899  
[record/4284621](https://zenodo.org/record/4284621). 900
- Muller, J. D. and Segev, L. IR-data-extraction: Tool 901  
to extract raw temperature data from FLIR R- 902  
jpegs, October 2020. URL [https://zenodo.org/](https://zenodo.org/record/4104314) 903  
[record/4104314](https://zenodo.org/record/4104314). 904

- 905 Muller, J. D., Rotenberg, E., Tatarinov, F.,  
906 Oz, I., and Yakir, D. Evidence for effi-  
907 cient non-evaporative leaf-to-air heat dissipa-  
908 tion in a pine forest under drought conditions.  
909 *bioRxiv*, page 2021.02.01.429145, February 2021.  
910 doi:10.1101/2021.02.01.429145.
- 911 O’sullivan, O. S., Heskell, M. A., Reich, P. B.,  
912 Tjoelker, M. G., Weerasinghe, L. K., Penillard,  
913 A., Zhu, L., Egerton, J. J. G., Bloomfield, K. J.,  
914 Creek, D., Bahar, N. H. A., Griffin, K. L., Hurry,  
915 V., Meir, P., Turnbull, M. H., and Atkin, O. K.  
916 Thermal limits of leaf metabolism across biomes.  
917 *Global Change Biology*, 23(1):209–223, January  
918 2017. doi:10.1111/gcb.13477.
- 919 Pieters, G. A. and Schurer, K. Leaf temperature  
920 measurement I. Thermocouples. *Acta Botanica*  
921 *Neerlandica*, 22(5):569–580, 1973.
- 922 Prashar, A. and Jones, H. G. Assessing Drought  
923 Responses Using Thermal Infrared Imaging. In  
924 Duque, P., editor, *Environmental Responses*  
925 *in Plants: Methods and Protocols*, Methods  
926 in Molecular Biology, pages 209–219. Springer,  
927 New York, NY, 2016. ISBN 978-1-4939-3356-3.  
928 doi:10.1007/978-1-4939-3356-3\_17.
- 929 Qubaja, R., Grünzweig, J. M., Rotenberg, E., and  
930 Yakir, D. Evidence for large carbon sink and long  
931 residence time in semiarid forests based on 15 year  
932 flux and inventory records. *Global Change Biology*,  
933 2019. doi:10.1111/gcb.14927.
- 934 Richardson, A. D., Aubrecht, D. M., Basler, D.,  
935 Hufkens, K., Muir, C. D., and Hanssen, L.  
936 Developmental changes in the reflectance spec-  
937 tra of temperate deciduous tree leaves, and im-  
938 plications for thermal emissivity and leaf tem-  
939 perature. *New Phytologist*, n/a(n/a), 2020.  
940 doi:10.1111/nph.16909.
- 941 Rosa, R. and Stanhill, G. Estimating long-wave  
942 radiation at the Earth’s surface from meas-  
943 urements of specific humidity. *International*  
944 *Journal of Climatology*, 34(5):1651–1656, 2014.  
945 doi:https://doi.org/10.1002/joc.3793.
- 946 Ross, J. *The radiation regime and architecture of*  
947 *plant stands*. Springer Science & Business Media,  
948 December 2012. ISBN 978-94-009-8647-3.
- 949 Rotenberg, E. and Yakir, D. Contribution  
950 of Semi-Arid Forests to the Climate Sys-  
951 tem. *Science*, 327(5964):451–454, January 2010.  
952 doi:10.1126/science.1179998.
- Rubio, E., Caselles, V., Coll, C., Valour, E., and 953  
Sospedra, F. Thermal–infrared emissivities of nat- 954  
ural surfaces: improvements on the experimental 955  
set-up and new measurements. *International* 956  
*Journal of Remote Sensing*, 24(24):5379–5390, 957  
January 2003. doi:10.1080/0143116031000102412. 958
- Smith, W. K., Dannenberg, M. P., Yan, D., Her- 959  
rmann, S., Barnes, M. L., Barron-Gafford, G. A., 960  
Biederman, J. A., Ferrenberg, S., Fox, A. M., Hud- 961  
son, A., Knowles, J. F., MacBean, N., Moore, D. 962  
J. P., Nagler, P. L., Reed, S. C., Rutherford, W. A., 963  
Scott, R. L., Wang, X., and Yang, J. Remote sens- 964  
ing of dryland ecosystem structure and function: 965  
Progress, challenges, and opportunities. *Remote* 966  
*Sensing of Environment*, 233:111401, November 967  
2019. doi:10.1016/j.rse.2019.111401. 968
- Song, Q.-H., Deng, Y., Zhang, Y. P., Deng, X.-B., 969  
Lin, Y.-X., Zhou, L.-G., Fei, X.-H., Sha, L.-Q., Liu, 970  
Y.-T., Zhou, W.-J., and Gao, J.-B. Comparison of 971  
infrared canopy temperature in a rubber plantation 972  
and tropical rain forest. *International Journal of* 973  
*Biometeorology*, 61(10):1885–1892, October 2017. 974  
doi:10.1007/s00484-017-1375-4. 975
- Still, C., Powell, R., Aubrecht, D., Kim, Y., Helliker, 976  
B., Roberts, D., Richardson, A. D., and Goulden, 977  
M. Thermal imaging in plant and ecosystem eco- 978  
logy: applications and challenges. *Ecosphere*, 10 979  
(6), 2019. 980
- Still, C., Rastogi, B., Page, G. F. M., Griffith, D. M., 981  
Sibley, A., Schulze, M., Hawkins, L., Pau, S., 982  
Detto, M., and Helliker, B. R. Imaging canopy 983  
temperature: shedding (thermal) light on ecosys- 984  
tem processes. *New Phytologist*, n/a(n/a), 2021. 985  
doi:https://doi.org/10.1111/nph.17321. 986
- Tarnopolsky, M. and Seginer, I. Leaf temperature er- 987  
ror from heat conduction along thermocouple wires. 988  
*Agricultural and Forest Meteorology*, 93(3):185–194, 989  
March 1999. doi:10.1016/S0168-1923(98)00123-3. 990
- Tatarinov, F., Rotenberg, E., Maseyk, K., Ogée, 991  
J., Klein, T., and Yakir, D. Resilience to sea- 992  
sonal heat wave episodes in a Mediterranean pine 993  
forest. *New Phytologist*, 210(2):485–496, April 994  
2016. doi:10.1111/nph.13791. 995
- Urban, J., Ingwers, M. W., McGuire, M. A., and 996  
Teskey, R. O. Increase in leaf temperature 997  
opens stomata and decouples net photosynthesis 998  
from stomatal conductance in *Pinus taeda* and 999  
*Populus deltoides* x *nigra*. *Journal of Exper-* 1000  
*imental Botany*, 68(7):1757–1767, March 2017. 1001  
doi:10.1093/jxb/erx052. 1002

- 1003 Usamentiaga, R., Venegas, P., Guerediaga, J., Vega,  
1004 L., Molleda, J., and Bulnes, F. G. Infrared Ther-  
1005 mography for Temperature Measurement and Non-  
1006 Destructive Testing. *Sensors*, 14(7):12305–12348,  
1007 July 2014. doi:10.3390/s140712305.
- 1008 Virtanen, P., Gommers, R., Oliphant, T. E., Haber-  
1009 land, M., Reddy, T., Cournapeau, D., Burovski,  
1010 E., Peterson, P., Weckesser, W., Bright, J., van der  
1011 Walt, S. J., Brett, M., Wilson, J., Millman, K. J.,  
1012 Mayorov, N., Nelson, A. R. J., Jones, E., Kern, R.,  
1013 Larson, E., Carey, C. J., Polat, I., Feng, Y., Moore,  
1014 E. W., VanderPlas, J., Laxalde, D., Perktold, J.,  
1015 Cimrman, R., Henriksen, I., Quintero, E. A., Har-  
1016 ris, C. R., Archibald, A. M., Ribeiro, A. H., Pedre-  
1017 gosa, F., and van Mulbregt, P. SciPy 1.0: fun-  
1018 damental algorithms for scientific computing in  
1019 Python. *Nature Methods*, 17(3):261–272, March  
1020 2020. doi:10.1038/s41592-019-0686-2.
- 1021 Vishnevetsky, I., Rotenberg, E., Kribus, A., and  
1022 Yakir, D. Method for accurate measurement of  
1023 infrared emissivity for opaque low-reflectance ma-  
1024 terials. *Applied Optics*, 58(17):4599–4609, 2019.
- 1025 Werner, C., Correia, O., Beyschlag, W., Werner,  
1026 C., Correia, O., and Beyschlag, W. Character-  
1027 istic patterns of chronic and dynamic photoin-  
1028 hibition of different functional groups in a Medi-  
1029 terranean ecosystem, Characteristic patterns of  
1030 chronic and dynamic photoinhibition of different  
1031 functional groups in a Mediterranean ecosystem.  
1032 *Functional Plant Biology, Functional Plant Bio-*  
1033 *logy*, 29, 29(8, 8):999–1011, 1011, August 2002.  
1034 doi:10.1071/PP01143, 10.1071/PP01143.
- 1035 Yong, J. W. H., Wong, S. C., and Farquhar,  
1036 G. D. Stomatal responses to changes in  
1037 vapour pressure difference between leaf and  
1038 air. *Plant, Cell & Environment*, 20(10):1213–  
1039 1216, 1997. doi:[https://doi.org/10.1046/j.1365-](https://doi.org/10.1046/j.1365-3040.1997.d01-27.x)  
1040 [3040.1997.d01-27.x](https://doi.org/10.1046/j.1365-3040.1997.d01-27.x).
- 1041 Zhang, L., Niu, Y., Zhang, H., Han, W., Li, G.,  
1042 Tang, J., and Peng, X. Maize Canopy Temper-  
1043 ature Extracted From UAV Thermal and RGB  
1044 Imagery and Its Application in Water Stress Mon-  
1045 itoring. *Frontiers in Plant Science*, 10, 2019.  
1046 doi:10.3389/fpls.2019.01270.
