# Supplementary material for: Dual reference method for high precision infrared measurement of leaf surface temperature under field conditions
Source: bioRxiv or medRxiv preprint supplement (doi:10.1101/2021.04.25.440729), 2021-04-26
Supplement: Supplementary file [file media-1.pdf]

## 1047 Supporting Information

### 1048 S1 Full derivation steps of the error calculations

1049 The total measurement uncertainty was calculated from the combined errors of each  
 1050 sensor (Table S1.1), i.e. the thermocouples, the FLIR A320 infrared camera (FLIR,  
 1051 2011), emissivity measurements (Vishnevetsky et al., 2019) and the Stefan-Boltzmann  
 1052 constant (Fritschen and Gay, 2012). Since the thermocouples were calibrated with the  
 1053 thermistor and the infrared camera was adjusted to the thermocouples, the uncertainty  
 1054 calculation uses the accuracy of the thermistor and the precision of the infrared camera.

**Table S1.1.** Accuracy and precision values available for all components of the system

| Sensor                                    | Accuracy      | Precision         | Precision [%] |
|-------------------------------------------|---------------|-------------------|---------------|
| IR camera (FLIR A320)                     | 2.0°C or 2.0% | <0.05 °C at 30 °C | 0.17          |
| Calibrated thermocouples (T-type)         | 0.2°C or 0.4% | 0.03 °C           |               |
| Thermistor (GA10K3MCD1)                   | 0.2°C         |                   |               |
| Emissivity $\varepsilon_{refl} \leq 0.1$  |               |                   | 28.6          |
| Emissivity $\varepsilon_{refl} \geq 0.90$ |               |                   | <0.5          |
| Emissivity $\varepsilon_{refl} \geq 0.95$ |               |                   | <0.4          |
| Stefan-Boltzmann const. $\sigma$          |               |                   | 0.051         |

1055 The calculation is done using the log derivative method (Fritschen and Gay, 2012)  
 1056 which allows to separate the contributions of each variable by using the derivation of  
 1057 the logarithm of the equation, i.e.  $d(\log y)/dy = 1/y$ , or consequently  $d(\log y) = dy/y$ .

1058 First,  $T_{ap}$  was corrected for the systematic camera error by applying the linear  
 1059 correction Eq. 3. According to the log derivative method, a logarithm is applied Eq. S1.1  
 1060 before deriving Eq. S1.2, where for a variable  $X$ , the precision or accuracy is  $\Delta X/X$ .  
 1061 The error of the systematic camera offset Eq. S1.3 is small since the slope factor  $a \approx 1$ .  
 1062 All temperature errors are given in Kelvin.

$$\log T_{ap,cor} = \log(aT_{ap} + b) \quad (\text{S1.1})$$

$$\frac{dT_{ap,cor}}{T_{ap,cor}} = \frac{d(aT_{ap} + b)}{(aT_{ap} + b)} \quad (\text{S1.2})$$

1063 Replacing derivatives (d) with finite differences ( $\Delta$ ), we get:

$$\frac{\Delta T_{ap,cor}}{T_{ap,cor}} = a \frac{\Delta T_{ap}}{(aT_{ap} + b)} = a \frac{\Delta T_{ap}}{T_{ap,cor}} \quad (\text{S1.3})$$

1064 The error of the camera-perceived longwave radiation  $L_{tot}$  Eq. S1.4 was calculated  
 1065 from the corrected apparent temperature  $T_{ap,cor}$  Eq. 4 & Eq. 3. The camera emissivity  
 1066  $\varepsilon_{camera} = 1$  is a setting and has no error. The effect of the atmospheric transmissivity is  
 1067 ignored because the camera was close to the object ( $\tau = 1$ ).

$$\frac{\Delta L_{camera}}{L_{camera}} = \frac{\Delta \sigma}{\sigma} + 4 \frac{\Delta T_{ap,cor}}{T_{ap,cor}} \quad (\text{S1.4})$$

The error of the background thermal radiation  $L_{bg}$  Eq. S1.5 was calculated based on the previous error of  $L_{camera}$  Eq. S1.4 and the corrected apparent (infrared) and measured (thermocouple) temperatures of the reflective reference plate,  $T_{ap,cor,refl}$  and  $T_{tc,refl}$ , respectively. The error of the emissivity measurement of the plate  $\varepsilon_{refl}$  is also considered. Since individual errors can be both, positive or negative, we sum only absolute values to insure that the errors are combined in the most unfavourable way (Fritschen and Gay, 2012).

$$\begin{aligned} \frac{\Delta L_{bg}}{L_{bg}} = \frac{\Delta \sigma}{\sigma} + \frac{\Delta T_{ap,cor,refl} 4T_{ap,refl}^3}{T_{ap,cor,refl}^4 - \varepsilon_{refl} T_{tc,refl}^4} + \\ \left| -\frac{\Delta T_{tc,refl} \varepsilon_{refl} 4T_{tc,refl}^3}{T_{ap,cor,refl}^4 - \varepsilon_{refl} T_{tc,refl}^4} \right| + \\ \frac{\Delta \varepsilon_{refl} T_{tc,refl}^4}{T_{ap,cor,refl}^4 - \varepsilon_{refl} T_{tc,refl}^4} + \left| -\frac{\Delta \varepsilon_{refl}}{1 - \varepsilon_{refl}} \right| \end{aligned} \quad (S1.5)$$

The error of the longwave radiation emitted by the object  $L_{obj}$  Eq. S1.6 was calculated from the errors of  $L_{camera}$  Eq. S1.4,  $L_{bg}$  Eq. S1.5 and the object's emissivity measurement  $\varepsilon_{obj}$ .

$$\begin{aligned} \frac{\Delta L_{obj}}{L_{obj}} = \frac{\Delta T_{ap,cor,obj} 4T_{ap,cor,obj}^3}{T_{ap,cor,obj}^4 - (1 - \varepsilon_{obj}) L_{bg}} + \\ \left| -\frac{\Delta L_{bg} (1 - \varepsilon_{obj})}{T_{ap,cor,obj}^4 - (1 - \varepsilon_{obj}) L_{bg}} \right| + \\ \frac{\Delta \varepsilon_{obj} L_{bg}}{T_{ap,cor,obj}^4 - (1 - \varepsilon_{obj}) L_{bg}} + \left| -\frac{\Delta \varepsilon_{obj}}{\varepsilon_{obj}} \right| \end{aligned} \quad (S1.6)$$

The error of  $L_{obj}$  Eq. S1.6 was used to calculate the error of the object temperature  $T_{obj}$  Eq. S1.7:

$$\frac{\Delta T_{obj}}{T_{obj}} = \frac{1}{4} \frac{\Delta L_{obj}}{L_{obj}} + \left| -\frac{1}{4} \frac{\Delta \sigma}{\sigma} \right| \quad (S1.7)$$

Finally, the error of  $\Delta_{T,leaf-air}$  could be calculated according to Eq. S1.8:

$$\frac{\Delta(\Delta_{T,leaf-air})}{(\Delta_{T,leaf-air})} = \frac{\Delta T_{leaf}}{T_{leaf} - T_{air}} + \left| -\frac{\Delta T_{air}}{T_{leaf} - T_{air}} \right| \quad (S1.8)$$

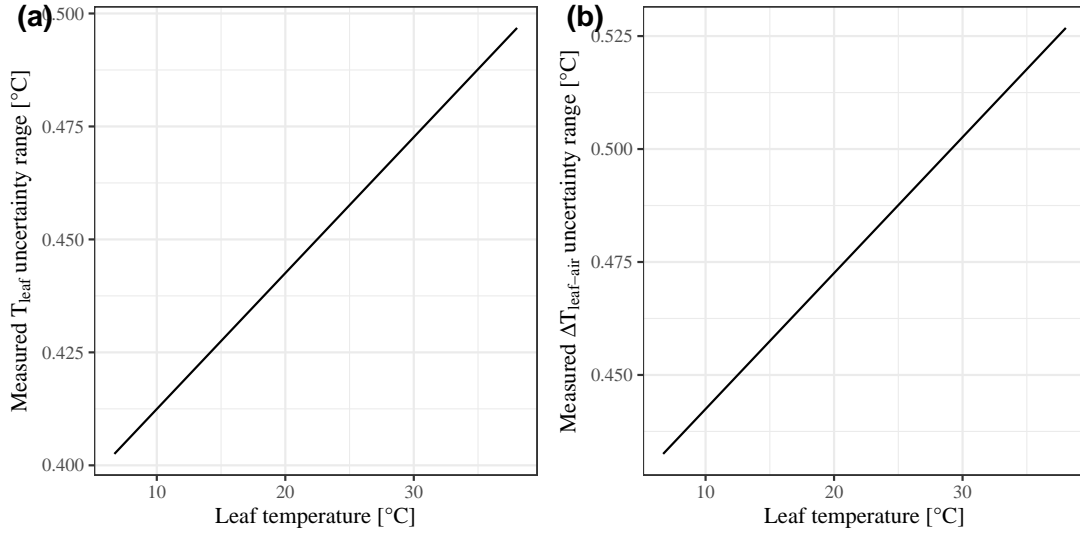

**Fig. S1.1.** Total measurement uncertainty range of leaf surface temperature ( $T_{leaf}$ ) and leaf-to-air temperature differences ( $\Delta T_{leaf-air}$ ) in dependence of real leaf temperature, calculated from the combined uncertainties of all sensors used in the system.

## 1081 S2 Calibration of systematic camera offset

1082 When a calibration needs to be done due to sensor degradation, each physical pixel in  
 1083 the camera is a separate sensor and requires its own correction. A pixel noise map can  
 1084 be created under conditions that create good uniformity of  $L_{bg}$  and temperature, as  
 1085 described by [Aubrecht et al. \(2016\)](#). The following method assumes that this sensor  
 1086 noise is negligible and describes a correction of the systematic camera offset.

1087 The systematic offset, which also depends on  $L_{bg}$ , is assumed to follow a linear  
 1088 regression of the form of [Eq. 3](#). The corrected apparent temperature of any surface  
 1089  $T_{ap,cor}$  corresponds to the raw camera reading of the apparent temperature  $T_{ap}$ , corrected  
 1090 for the camera offset using parameters  $a$  and  $b$ .

1091 A simple proof-of-concept process of calibration is described below and in the flowchart  
 1092 ([Fig. S2.1](#), left). Of course, instead of the presented manual search for  $a$  and  $b$ , a problem  
 1093 of numerical optimization could be devised. In this case, the objective function is the  
 1094 RMS difference between the measured and calculated temperatures, and  $(a, b)$  is the  
 1095 independent parameters set.

1096 This calibration requires a range of temperature and background radiation conditions,  
 1097 which can be achieved in the field using the natural variability or in the lab. Therefore, a  
 1098 few days of measurements are sufficient, but it will be more robust with a larger dataset.  
 1099 Each reference plate temperature measurement using the infrared camera is the mean of  
 1100 multiple pixels near the centre of the respective plate.

1101 First, a table of parameters  $a$  and  $b$  (as rows and columns, respectively) in a range of  
 1102  $\pm 10$  with a high resolution of up to 4 decimals (for maximal precision) is created in order  
 1103 to test all combinations of  $a$  and  $b$  for the appropriate calibration values. Then, the  
 1104 table is filled with an initial background thermal radiation  $L_{bg,initial}$  calculated for each  
 1105 combination of  $a$  and  $b$  according to [Eq. 4](#) & [Eq. 5](#) (by using  $aT_{ap,refl} + b$  to calculate  
 1106  $L_{camera,refl}$ ).

### Full calculation workflow of corrected surface temperature from infrared camera and reference plates

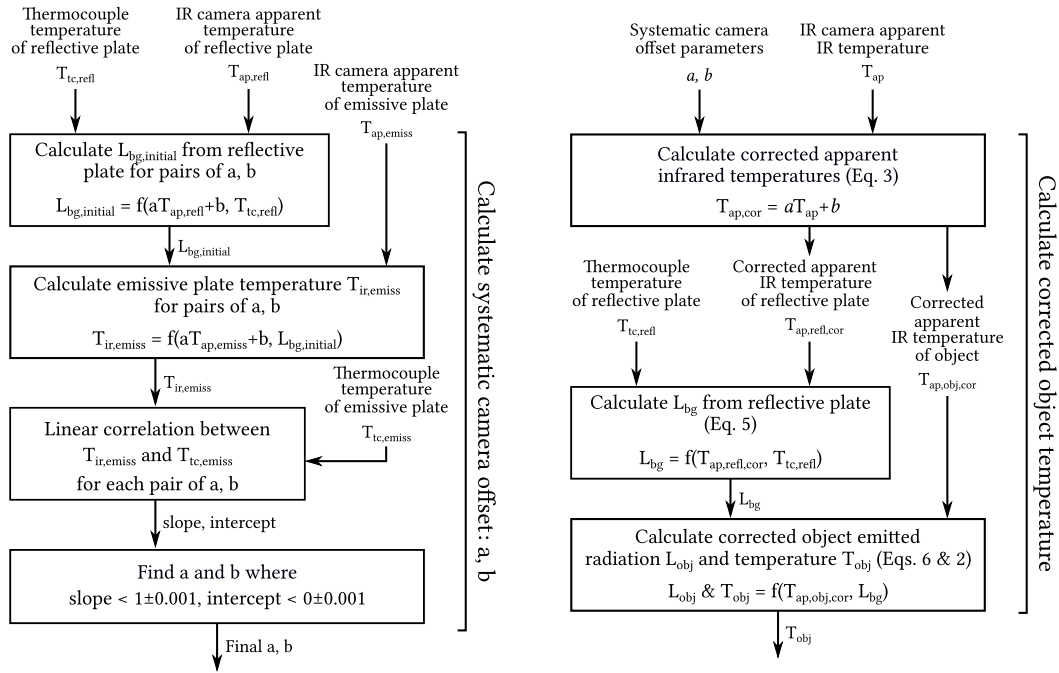

**Fig. S2.1.** Flowchart of the correction of infrared measurements of leaf surface temperature including: (left) Calculation of the systematic camera offset parameters ( $a$ ,  $b$ ) and (right) calculation of the  $L_{bg}$  and corrected leaf surface temperature

Second, again for each combination of  $a$  and  $b$ , a ‘corrected’ temperature of the emissive plate  $T_{ir,emiss}$  is calculated according to Eq. 6 & Eq. 2 using their corresponding  $L_{bg,initial}$ , where  $L_{camera,obj} = 1\sigma(aT_{ap,emiss} + b)^4$  (Eq. 4).

Third, the resulting  $T_{ir,emiss}$  for all combinations of  $a$  and  $b$  are correlated to the independent thermocouple temperature measurements of the emissive plate temperature  $T_{emiss}$ . Those correlations each provide a slope and an intercept.

Finally, for the final camera calibration parameters  $a$  and  $b$ , the infrared and thermocouple measurements should correspond to each other. Therefore, the values of  $a$  and  $b$  are extracted from the table where the slope is the nearest to 1 and the intercept to 0.

The values of parameters  $a$  and  $b$  are then used to calculate all corrected object surface temperatures  $T_{ir,obj}$  according to Eqs. (1), (2) and (4)–(6), using the apparent infrared temperatures  $T_{ap,cor}$  resulting from Eq. 3 (Fig. S2.1, right).

### 1119 S3 Needle identification: Manual approach vs. script

1120 The results of the automatic needle identification script (Muller and Dingjan, 2020) were  
 1121 evaluated by comparing them to manual sampling of needles contained in regions of  
 1122 interest (ROI) on infrared images. The two methods were highly correlated ( $R^2 = 0.99$ ,  
 1123  $P < .001$ ; Fig. S3.1), which confirms the robustness of our script. Manual sampling  
 1124 involved selecting small polygons (ROI) on the image, of which the mean temperature  
 1125 of all pixels was calculated. The ROIs were often more than 5 px wide due to the  
 1126 resolution of the image and were selected in areas with numerous densely packed and  
 1127 overlapping needle-leaves in order to avoid sampling the unfocused background. However,  
 1128 this manual approach was not perfect, which reduced the exactitude of the needle-leaf  
 1129 selection. The automatic script was able to more precisely identify needle-leaves due to  
 1130 its ability to precisely identify them.

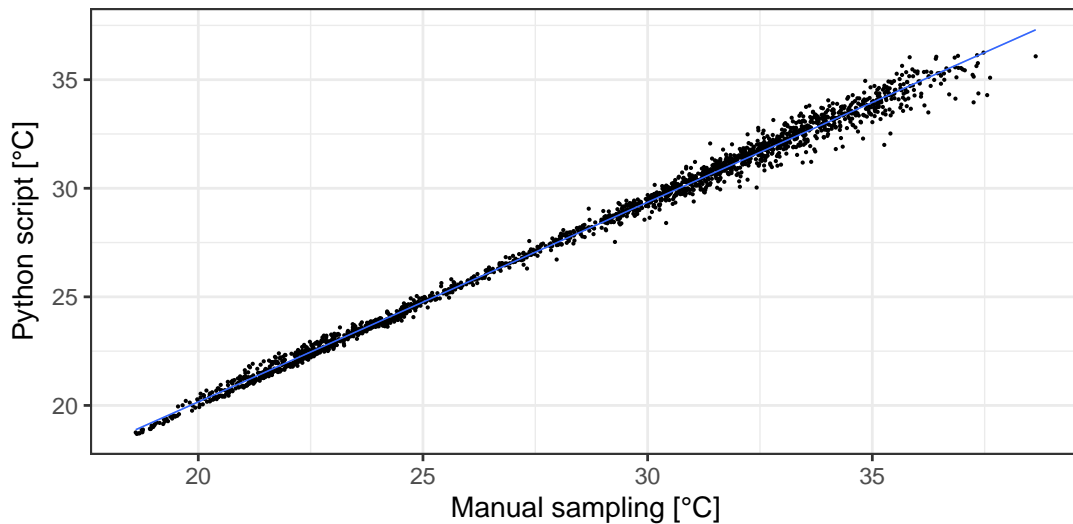

**Fig. S3.1.** Comparison between manual sampling of leaf temperature (by Revital Weic) and the automatic python script, where  $y = 1.08x - 1.76$ ,  $R^2 = 0.99$ ,  $P < .001$ . Manual sampling typically included polygons more than 5 pixels wide, which introduces small errors

### 1131 S4 Leaf thermocouples vs. infrared data

1132 A set of fine conifer needle surface temperature thermocouples ( $\Delta$ LA-C, Ecomatik, Mu-  
 1133 nich, Germany) and a fine air temperature thermistor (GA10K3MCD1, TE Connectivity,  
 1134 Schaffhausen, Switzerland) were installed on an adjacent twig for comparison to IR  
 1135 readings. Air temperature measurements of the thermocouple were good (Fig. S4.1a),  
 1136 as shown by the correlation with the reference thermistor, both in the radiation shield  
 1137 ( $y = 0.99x + 0.0003$ ,  $R^2 = 0.99$ ,  $P < .001$ ) and in the open air near the leaves  
 1138 ( $y = 0.99x + 0.06$ ,  $R^2 = 0.99$ ,  $P < .001$ ). Validation of the measurements of  $\Delta T_{leaf-air}$   
 1139 using our system based on an infrared camera ( $\Delta T_{IR}$ ) with concurrent measurements  
 1140 using the thermocouple-based Ecomatik  $\Delta$ LA-C system ( $\Delta T_{tc}$ ) failed to show a cor-  
 1141 relation between the two methods ( $\Delta T_{IR} = -2.84\Delta T_{tc} - 0.29$ ,  $R^2 = 0.18$ ,  $P < .001$ ;  
 1142 Fig. S4.1b). This could be explained by the difference in leaf surface measurements,  
 1143 where the thermocouple junctions of the Ecomatik  $\Delta$ LA-C system are more exposed to  
 1144 the environment (Tarnopolsky and Seginer, 1999; Pieters and Schurer, 1973) compared  
 1145 to the infrared measurements of leaf surface temperature.

Figure S4.1 shows the correlation between the  $\Delta$ LA-C conifer needle surface temperature thermocouples system (Ecomatik, Munich, Germany) with its fine air temperature thermistor (GA10K3MCD1, TE Connectivity, Schaffhausen, Switzerland) and our infrared camera readings. 1146  
1147  
1148  
1149

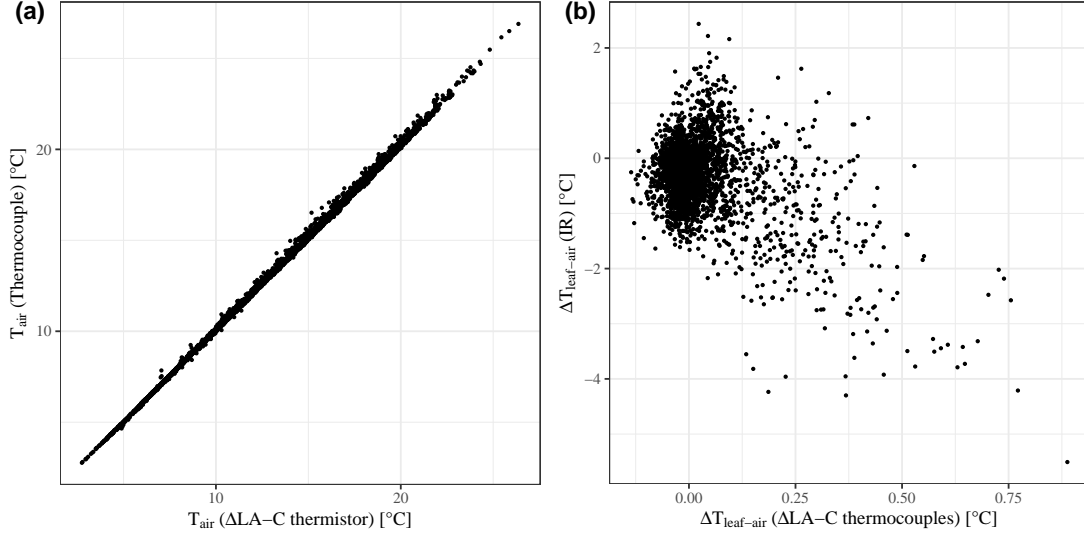

**Fig. S4.1.** Comparison between contact thermocouple-based Ecomatik  $\Delta$ LA-C and infrared (IR) measurements of (a) air temperature ( $T_{air,tc} = 1.02T_{air,\Delta LA-C} - 0.09$ ,  $R^2 = 0.99$ ,  $P < .001$ ) and (b)  $\Delta T_{leaf-air}$  ( $R^2 = 0.18$ ,  $P < .001$ )

## S5 Comparison of $L_{bg}$ between the reflective plate and commercial sensors 1150 1151

$L_{bg}$  was estimated using the reflective plate by solving Eq. 5, as detailed in the Methods 1152  
section (spectral range: 7.5–13  $\mu$ m). Figure S5 shows a comparison to the below-canopy 1153  
full-range LWR Eppley sensors 20m away from it near the eddy covariance flux tower 1154  
(spectral range: 4–50  $\mu$ m, calibrated to 4–100  $\mu$ m) using night-time data. This comparison 1155  
is not a calibration but rather a comparison to assess the consistency of the sensors due 1156  
to their different spectral range. Indeed, measurements were well correlated ( $R^2 = 0.98$ , 1157  
 $P < .001$ ,  $RMSE = 4.35$ ), which shows that  $L_{bg}$  from IR camera measurements of the 1158  
reflective plate represent the full spectral range of 4–100  $\mu$ m well. The range and RMSE 1159  
shown in this correlation are due to the differences in location and sensors between the 1160  
two setups: The Eppley sensor is hemispherical and average measurements from a wide 1161  
variety of angles (and thus area). 1162

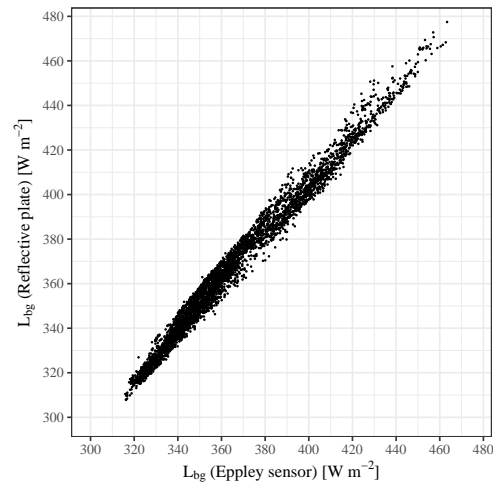

**Fig. S5.1.** Comparison between night-time  $L_{bg}$  measurements using industrial Eppley sensors (4–50  $\mu\text{m}$ ; x axis) and the reflective reference plate using an IR camera (7.5–13  $\mu\text{m}$ ; y axis). Measurements are well correlated ( $R^2 = 0.98$ ,  $P < .001$ ,  $RMSE = 4.35$ ). Range is attributed to different locations of both setups, but shows that the limited spectral range of the IR camera represents the full range well.

## 1163 S6 Thermocouple calibration

1164 The thin-wire thermocouples were calibrated in stirred ice water (to determine the offset  
 1165 from 0 °C). Fig. S6.1 shows the comparison between them after this calibration, under  
 1166 fluctuating field conditions (solar radiation, wind, etc.) while installed in a radiation  
 1167 shield (Model 41003; R. M. Young Company, Traverse City MI, USA). Small fast  
 1168 turbulent air flow fluctuations still led to minor differences between the thermocouples,  
 1169 but in general, their readings agreed well with each other (Fig. S6.1).

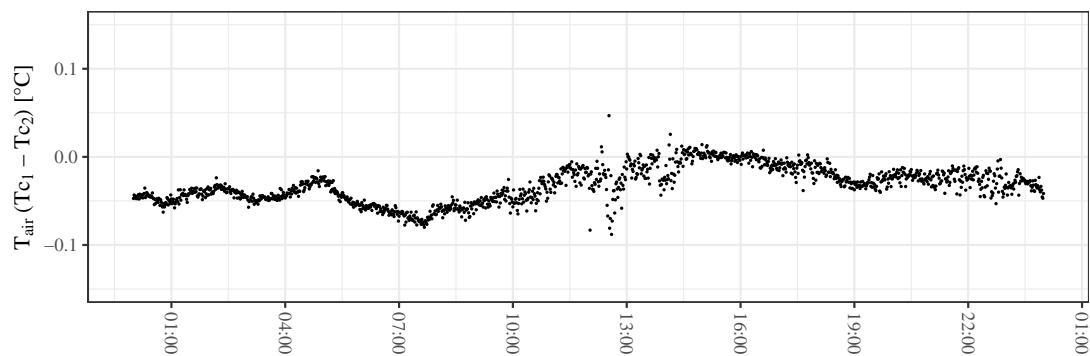

**Fig. S6.1.** Fluctuations of the difference between two thin-wire thermocouples compared to each other under field conditions in a Young radiation shield for one day with low environmental influences (e.g. turbulent wind, radiation)

## S7 Method comparison: Dual vs. Single reference plate

1170

We quantitatively assessed including both the camera drift corrections and the effect 1171  
of the reflected  $L_{bg}$  using field measurements by comparing apparent IR temperatures 1172  
correction methods using conceptual data ranging from 15–35 °C with an  $L_{bg}$  of 300– 1173  
550  $\text{W m}^{-2}$ . ‘Method 1’ accounts for the reflected  $L_{bg}$  and a systematic camera offset 1174  
and ‘Method 2’ uses a correlation to an single emissive reference plate. A reference 1175  
temperature (from ‘Method 1’) of 32.5 °C with  $\varepsilon = 0.90$  can correspond to a 31.6–32.6 °C 1176  
range when only an emissive reference plate is used (Fig. S7.1). For a higher emissivity 1177  
of 0.95, the inaccuracy of method 2 is smaller, i.e. a range of 31.2–32.6 °C (Fig. S7.1). 1178

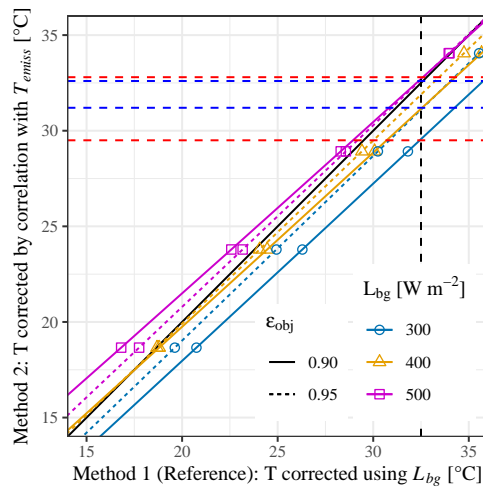

**Fig. S7.1.** Comparison between apparent IR temperatures correction methods accounting for the reflected  $L_{bg}$  and a systematic camera offset (x axis; ‘Method 1’, considered the reference), and using a correlation to an single emissive reference plate (y axis; ‘Method 2’), for conceptual data ranging from 15–35 °C with an  $L_{bg}$  of 300–550  $\text{W m}^{-2}$  (colours/shapes) for 2 materials of  $\varepsilon = 0.90$  and 0.95 (line types). Dashed horizontal lines show the range of T in method 2 for a reference  $T = 32.5$  °C (dashed black), for  $\varepsilon = 0.90$  (red) and  $\varepsilon = 0.95$  (blue)
